# Supplementary material for: Anions Containing Tripoid Conjugated N4− System: Salts of 5-(Substituted Amino)-[1,2,3]triazolo[4,5-c][1,2,5]oxadiazol-5-ium-4-ides, as well as Their Synthesis, Structure, and Thermal Stability
Source: MDPI journal article supplement (doi:10.3390/molecules27196287), 2022-09-23

# **Anions Containing Tripoid Conjugated N<sub>4</sub><sup>-</sup> System: Salts of 5-(Substituted Amino)-[1,2,3]triazolo[4,5-*c*][1,2,5]oxadiazol-5-ium-4-ides, as well as their Synthesis, Structure, and Thermal Stability**

Alexey A. Voronin <sup>1,\*</sup>, Sofya P. Balabanova <sup>1</sup>, Ivan V. Fedyanin <sup>2</sup>, Aleksandr M. Churakov <sup>1,\*</sup>, Alla N. Pivkina <sup>3</sup>, Yurii A. Strelenko <sup>1</sup>, Michael S. Klenov <sup>1</sup> and Vladimir A. Tartakovsky <sup>1</sup>

<sup>1</sup> N. D. Zelinsky Institute of Organic Chemistry, Russian Academy of Sciences, 47 Leninsky prosp., 119991 Moscow, Russia

<sup>2</sup> A. N. Nesmeyanov Institute of Organoelement Compounds, Russian Academy of Sciences, 28 Vavilova St., 119991 Moscow, Russia

<sup>3</sup> N. N. Semenov Federal Research Center for Chemical Physics, Russian Academy of Sciences, 4 Kosygina St., Building 1, 119991 Moscow, Russia

## Xray crystallographic data

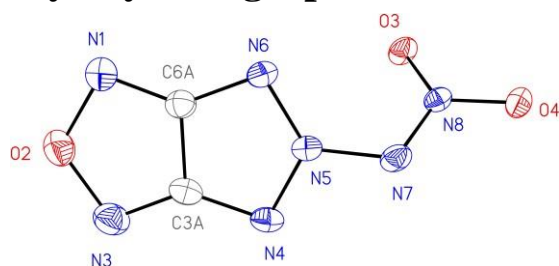

**Figure S1.** General view of the anion **3a** in crystal. Anisotropic displacement parameters are drawn at 50% probability level.

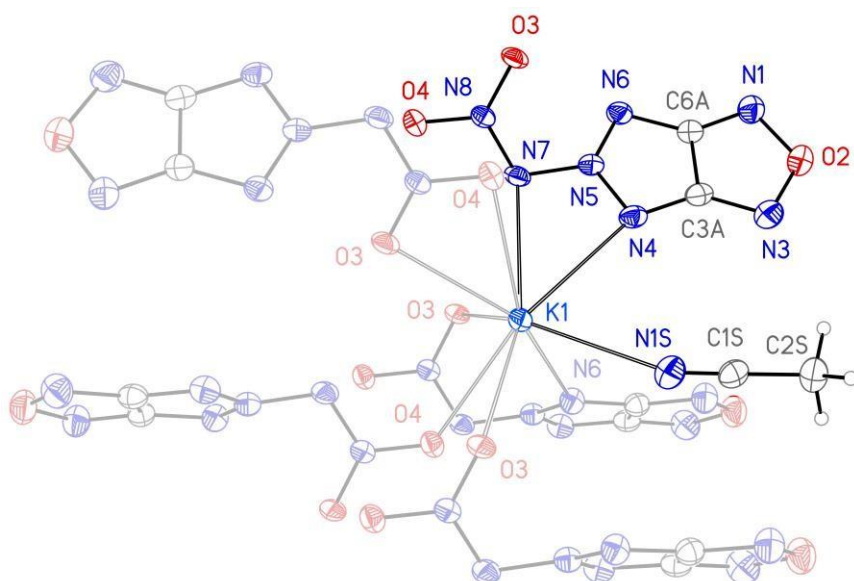

**Figure S2.** The environment of the potassium cation in crystal **3a** demonstrating its coordination by different heteroatoms of the anion and the acetonitrile molecule. The moieties constituting the asymmetric part of the unit cell are highlighted.

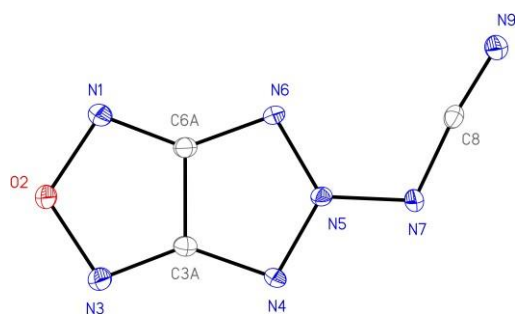

**Figure S3.** General view of the anion **3b** in crystal. Anisotropic displacement parameters are drawn at 50% probability level.

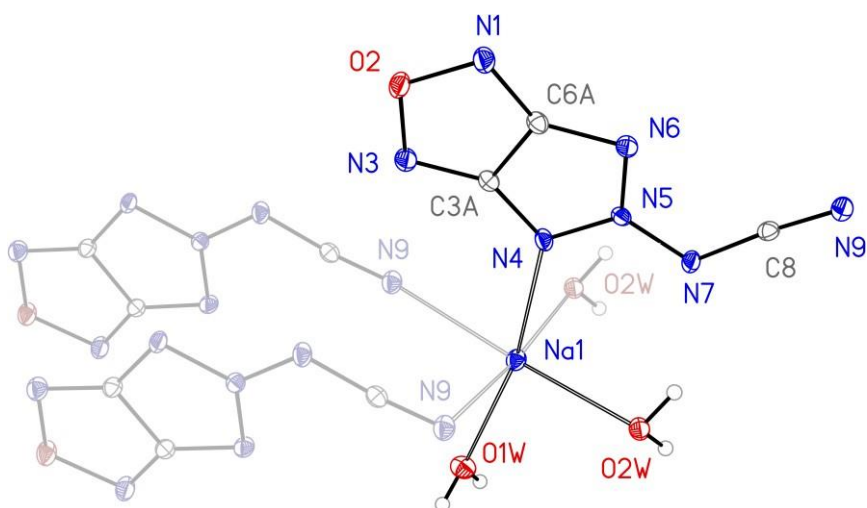

**Figure S4.** The environment of the sodium cation in crystal **3b** demonstrating its coordination by different heteroatoms of the anion and water molecules. The moieties constituting the asymmetric part of the unit cell are highlighted.

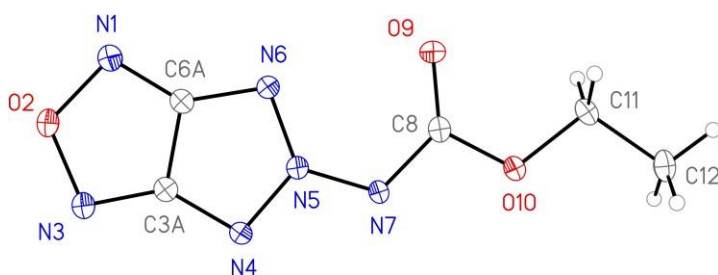

**Figure S5.** General view of the anion **3c** in crystal. Anisotropic displacement parameters are drawn at 50% probability level.

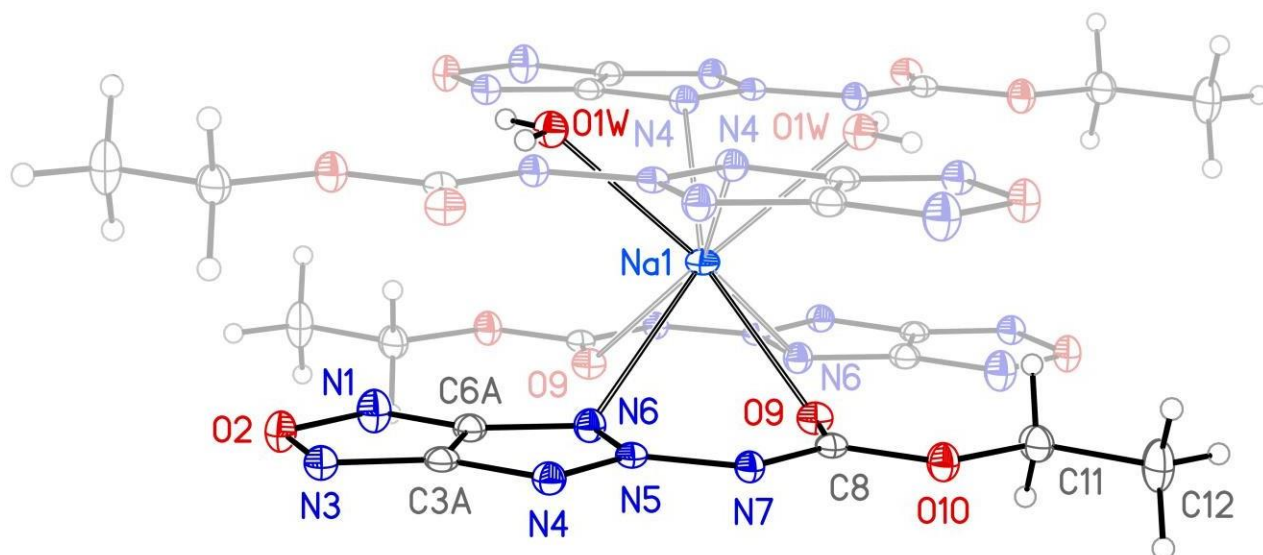

**Figure S6.** The environment of the sodium cation in crystal **3b** demonstrating its coordination by different heteroatoms of the anion and water molecules. The moieties constituting the asymmetric part of the unit cell are highlighted. The anion and the water molecule lie on a mirror plane and the sodium cation lies on the intersection of a 2-fold axis and a glide plane (sp. gr.  $C2/m$ ).

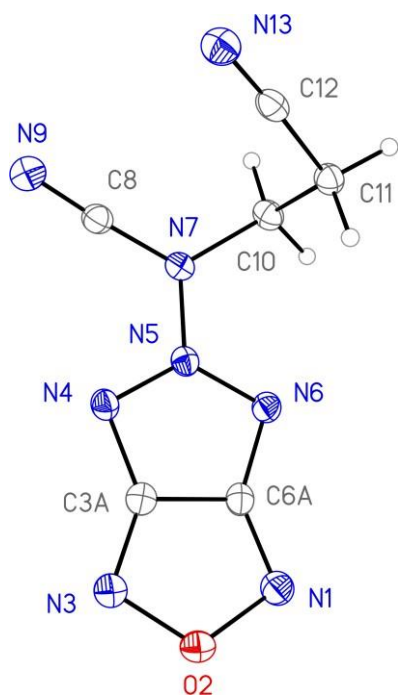

**Figure S7.** General view of the molecule **4b** in crystal. Anisotropic displacement parameters are drawn at 50% probability level.

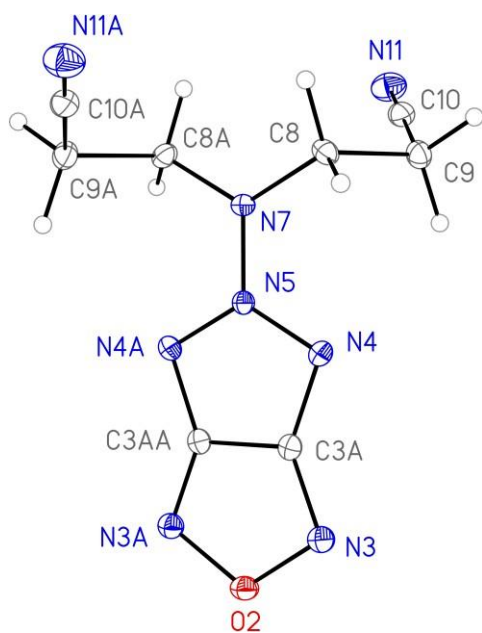

**Figure S8.** General view of the molecule **6** in crystal. Anisotropic displacement parameters are drawn at 50% probability level.

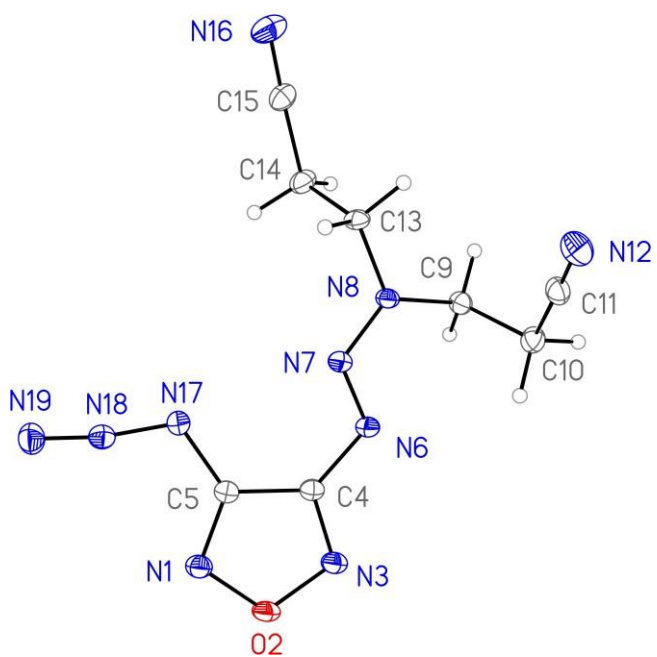

**Figure S9.** General view of the molecule **7** in crystal. Anisotropic displacement parameters are drawn at 50% probability level.

**Table S1.** Crystallographic data for crystals of compounds **3a–c**, **4b**, **6–7**.

| compound                                                          | <b>3a</b>                                                    | <b>3b</b>                                                     | <b>3c</b>                                                     | <b>4b</b>                                      | <b>6</b>                                       | <b>7</b>                                        |
|-------------------------------------------------------------------|--------------------------------------------------------------|---------------------------------------------------------------|---------------------------------------------------------------|------------------------------------------------|------------------------------------------------|-------------------------------------------------|
| CCDC                                                              | 2183138                                                      | 2183139                                                       | 2183140                                                       | 2183141                                        | 2183142                                        | 2183143                                         |
| empirical formula                                                 | C <sub>4</sub> H <sub>3</sub> KN <sub>8</sub> O <sub>3</sub> | C <sub>3</sub> H <sub>4</sub> N <sub>7</sub> NaO <sub>3</sub> | C <sub>5</sub> H <sub>7</sub> N <sub>6</sub> NaO <sub>4</sub> | C <sub>6</sub> H <sub>4</sub> N <sub>8</sub> O | C <sub>8</sub> H <sub>8</sub> N <sub>8</sub> O | C <sub>8</sub> H <sub>8</sub> N <sub>10</sub> O |
| T, K                                                              | 250.24                                                       | 209.12                                                        | 238.16                                                        | 204.17                                         | 232.22                                         | 260.24                                          |
| crystal system                                                    | 140                                                          | 100                                                           | 100                                                           | 120                                            | 100                                            | 120                                             |
| space group                                                       | <i>P</i> 2 <sub>1</sub> / <i>c</i>                           | <i>P</i> na2 <sub>1</sub>                                     | <i>C</i> 2/ <i>m</i>                                          | <i>P</i> 2 <sub>1</sub>                        | <i>C</i> 2/ <i>c</i>                           | <i>C</i> 2/ <i>c</i>                            |
| Z / Z'                                                            | 4 / 1                                                        | 4 / 1                                                         | 4 / 0.5                                                       | 2 / 1                                          | 4 / 0.5                                        | 8 / 1                                           |
| <i>a</i> , Å                                                      | 16.0696(12)                                                  | 12.2360(3)                                                    | 13.1460(11)                                                   | 6.5170(4)                                      | 13.0457(4)                                     | 20.5474(19)                                     |
| <i>b</i> , Å                                                      | 5.7168(4)                                                    | 17.6766(3)                                                    | 6.2603(5)                                                     | 5.4602(4)                                      | 11.8643(4)                                     | 6.4371(6)                                       |
| <i>c</i> , Å                                                      | 10.2887(7)                                                   | 3.58020(10)                                                   | 12.4249(11)                                                   | 12.1137(8)                                     | 6.5869(2)                                      | 17.5774(17)                                     |
| $\beta$ , °                                                       | 91.457(3)                                                    |                                                               | 117.552(2)                                                    | 105.382(3)                                     | 100.2912(18)                                   | 93.468(2)                                       |
| <i>V</i> , Å <sup>3</sup>                                         | 944.88(12)                                                   | 774.36(3)                                                     | 906.58(13)                                                    | 415.61(5)                                      | 1003.11(6)                                     | 2320.6(4)                                       |
| <i>d</i> <sub>calc</sub> , g cm <sup>−3</sup>                     | 1.759                                                        | 1.794                                                         | 1.745                                                         | 1.631                                          | 1.538                                          | 1.490                                           |
| $\mu$ (MuK $\alpha$ ), mm <sup>−1</sup>                           | 5.72                                                         | 2.00                                                          | 1.88                                                          | 1.25                                           | 1.14                                           | 1.12                                            |
| 2 $\theta$ <sub>max</sub> , °                                     | 60.0                                                         | 60.0                                                          | 60.0                                                          | 66.3                                           | 60.0                                           | 60.0                                            |
| collected reflns.                                                 | 11049                                                        | 19383                                                         | 7565                                                          | 6470                                           | 5948                                           | 9893                                            |
| unique reflns.                                                    | 2727                                                         | 2235                                                          | 1438                                                          | 3068                                           | 1473                                           | 3357                                            |
| reflns. with <i>I</i> > 2 $\sigma$ ( <i>I</i> )                   | 2347                                                         | 2128                                                          | 1266                                                          | 2561                                           | 1336                                           | 2787                                            |
| <i>R</i> <sub>1</sub>                                             | 0.0427                                                       | 0.0274                                                        | 0.0438                                                        | 0.0375                                         | 0.0330                                         | 0.0356                                          |
| <i>wR</i> <sub>2</sub>                                            | 0.1134                                                       | 0.0713                                                        | 0.1101                                                        | 0.0827                                         | 0.0910                                         | 0.0940                                          |
| GOF on F <sup>2</sup>                                             | 1.066                                                        | 1.049                                                         | 1.058                                                         | 1.010                                          | 1.038                                          | 1.044                                           |
| $\rho$ <sub>max</sub> / $\rho$ <sub>min</sub> , e Å <sup>−3</sup> | 0.743/-0.363                                                 | 0.452/-0.211                                                  | 0.724/-0.527                                                  | 0.310/-0.197                                   | 0.499/-0.295                                   | 0.376/-0.227                                    |

**Table S2.** Selected bond lengths and angles of the heterocycles in compounds **3a-c**, **4b**, **6-7**.

| compound   | <b>3a</b>       | <b>3b</b>  | <b>3c</b>  | <b>4b</b>  | <b>6*</b>  | <b>7</b>   |
|------------|-----------------|------------|------------|------------|------------|------------|
|            | bond lengths, Å |            |            |            |            |            |
| N1–O2      | 1.407(2)        | 1.4056(18) | 1.405(2)   | 1.399(2)   | 1.4118(8)  | 1.3916(11) |
| O2–N3      | 1.400(3)        | 1.4087(18) | 1.408(2)   | 1.402(2)   | 1.4118(8)  | 1.3854(11) |
| N1–C6A     | 1.315(3)        | 1.308(2)   | 1.311(3)   | 1.314(3)   | 1.3114(11) | 1.3027(13) |
| N3–C3A     | 1.319(3)        | 1.310(2)   | 1.310(3)   | 1.318(3)   | 1.3114(11) | 1.3097(12) |
| N4–C3A     | 1.358(3)        | 1.3695(19) | 1.363(3)   | 1.371(3)   | 1.3693(10) |            |
| N6–C6A     | 1.371(3)        | 1.361(2)   | 1.368(3)   | 1.376(2)   | 1.3693(10) |            |
| N4–N5      | 1.337(2)        | 1.3420(18) | 1.360(2)   | 1.328(2)   | 1.3465(8)  |            |
| N5–N6      | 1.339(2)        | 1.3535(17) | 1.347(2)   | 1.324(2)   | 1.3465(8)  |            |
| C3A–C6A    | 1.408(3)        | 1.414(2)   | 1.406(3)   | 1.406(3)   | 1.4177(15) | 1.4381(14) |
| N5–N7      | 1.382(2)        | 1.3368(18) | 1.338(2)   | 1.379(2)   | 1.3320(14) |            |
|            | bond angles, °  |            |            |            |            |            |
| N1–O2–N3   | 113.97(15)      | 113.11(11) | 113.27(15) | 114.05(13) | 113.47(8)  | 111.05(7)  |
| O2–N1–C6A  | 101.59(17)      | 102.58(12) | 102.47(17) | 102.13(16) | 102.19(6)  | 105.12(8)  |
| O2–N3–C3A  | 102.35(17)      | 102.49(12) | 102.03(16) | 101.79(16) | 102.19(6)  | 105.79(8)  |
| N1–C6A–3A  | 111.71(18)      | 110.99(14) | 110.77(18) | 110.96(19) | 111.08(5)  | 108.36(8)  |
| N3–C3A–C6A | 110.39(19)      | 110.82(13) | 111.46(19) | 111.08(19) | 111.08(5)  | 109.67(9)  |
| C3A–C6A–N6 | 109.48(17)      | 109.87(13) | 109.70(18) | 109.52(18) | 109.84(4)  |            |
| C6A–C3A–N4 | 110.11(17)      | 109.47(14) | 110.02(18) | 109.73(18) | 109.84(4)  |            |
| C6A–N6–N5  | 99.44(15)       | 100.29(12) | 100.73(16) | 98.93(16)  | 99.53(7)   |            |
| C3A–N4–N5  | 99.70(16)       | 100.44(12) | 100.46(16) | 98.94(16)  | 99.53(7)   |            |
| N4–N5–N6   | 121.25(16)      | 119.92(13) | 119.09(16) | 122.87(14) | 121.27(9)  |            |
| N4–N5–N7   | 114.84(15)      | 117.27(12) | 114.18(16) | 118.60(16) | 119.37(5)  |            |
| N6–N5–N7   | 123.39(16)      | 122.81(13) | 126.73(17) | 118.50(16) | 119.37(5)  |            |

\*Some bond lengths and angles for **6** are pairwise identical due to C<sub>2</sub> molecular symmetry in the crystal.

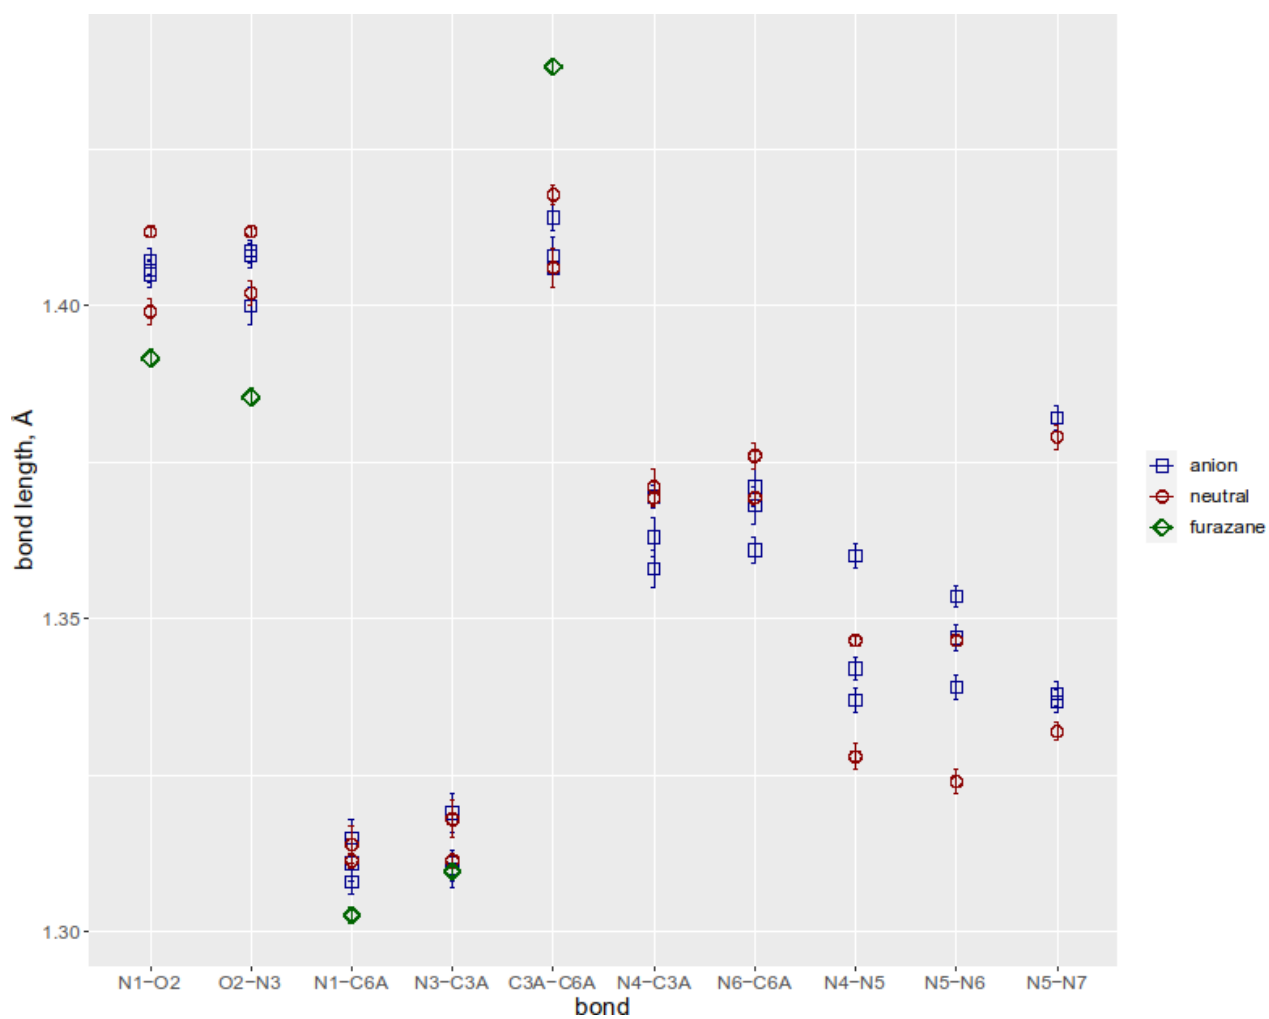

**Figure S10.** Graphical representation of bond length distribution in anions (**3a-3c**), neutral molecules (**4b** and **6**) and substituted furazane **7**. The s.u. values from the least square refinement are provided with error bars.



## Thermal behavior

**Table S3.** Summary of thermal stability data

| Compound  | Melting point, °C | Decomposition onset,* °C |
|-----------|-------------------|--------------------------|
| <b>3a</b> | 152               | 152                      |
| <b>3b</b> | –                 | 190                      |
| <b>3c</b> | –                 | 122                      |
| <b>4b</b> | 76                | 185                      |
| <b>4c</b> | 61                | 233                      |
| <b>5</b>  | 127               | 127                      |
| <b>6</b>  | 139               | 234                      |
| <b>7</b>  | 79                | 79 (221)                 |

\*The extrapolated onset temperature of the exothermic peak by DSC at 5 K min<sup>-1</sup> rate.

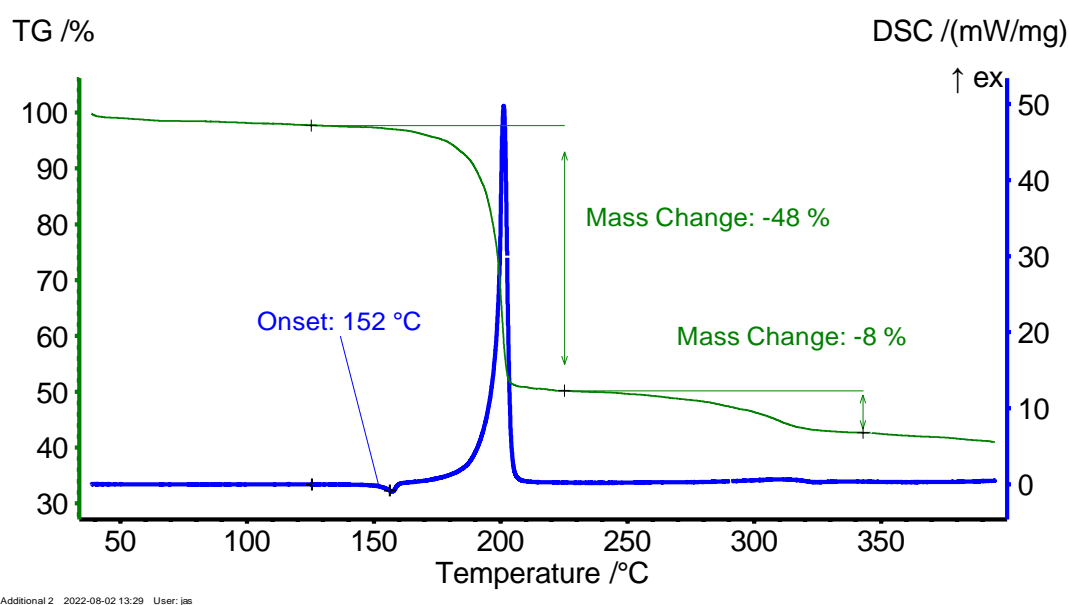

**Figure S11.** DSC (blue curve) and mass loss (TG, green curve) signals for **3a** heated at 5 K min<sup>-1</sup> rate.

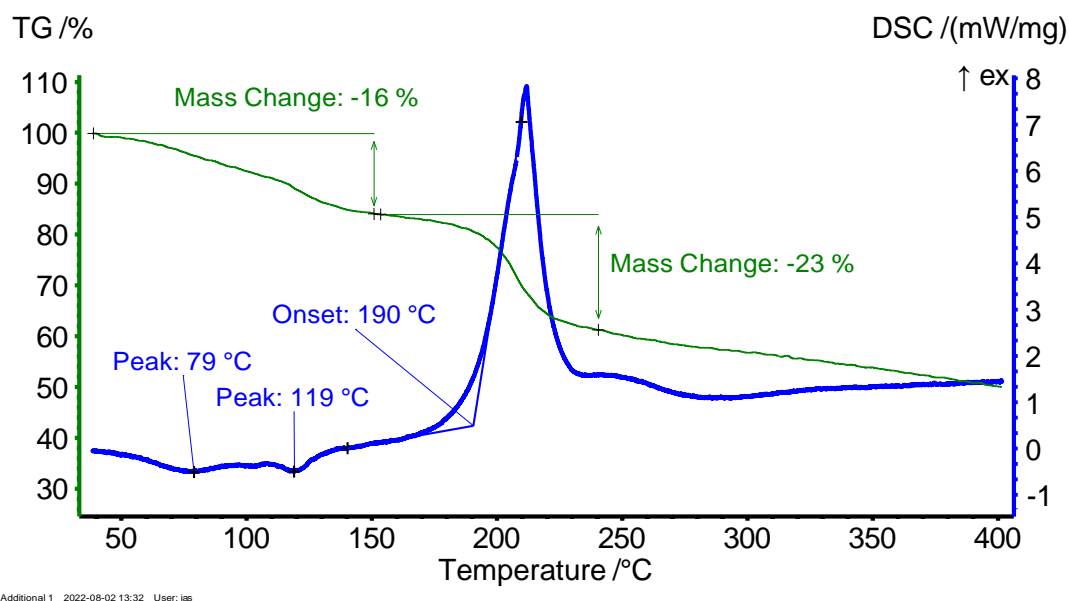

**Figure S12.** DSC (blue curve) and mass loss (TG, green curve) signals for **3b** heated at 5 K min<sup>-1</sup> rate.

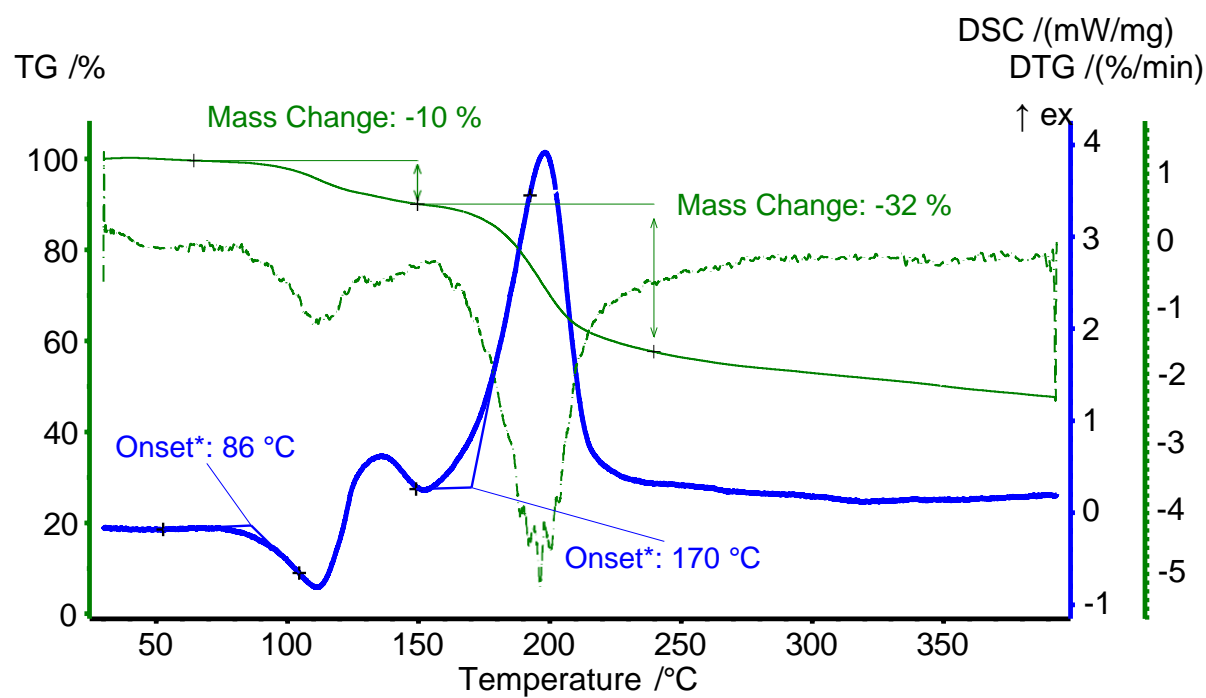

**Figure S13.** DSC/TG signal for **3c** heated at 5 K min<sup>-1</sup> rate.

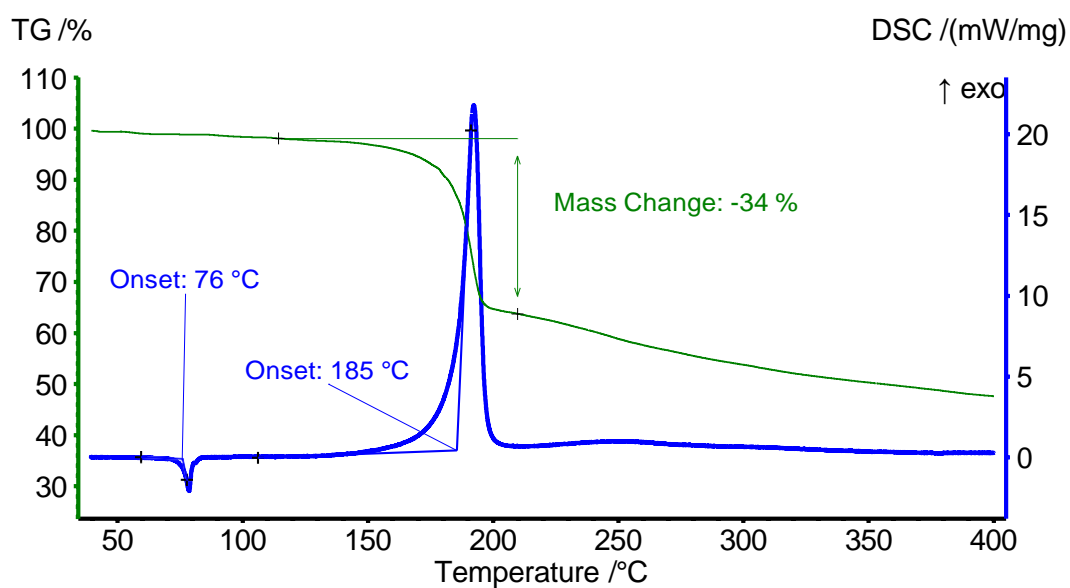

**Figure S14.** DSC (blue curve) and mass loss (TG, green curve) signals for **4b** heated at 5 K min<sup>-1</sup> rate.

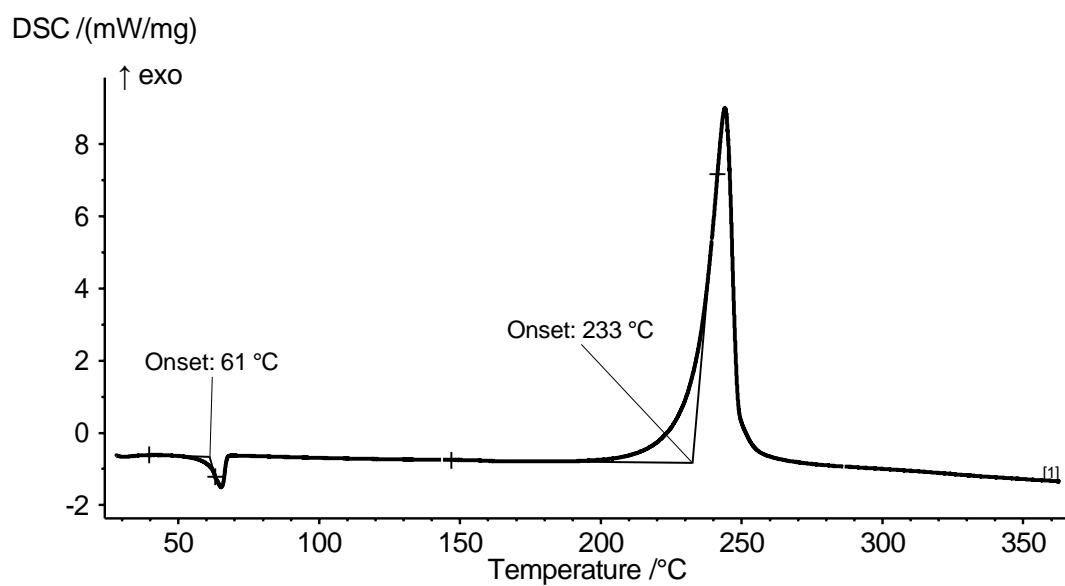

**Figure S15.** DSC signal for **4c** heated at 5 K min<sup>-1</sup> rate.

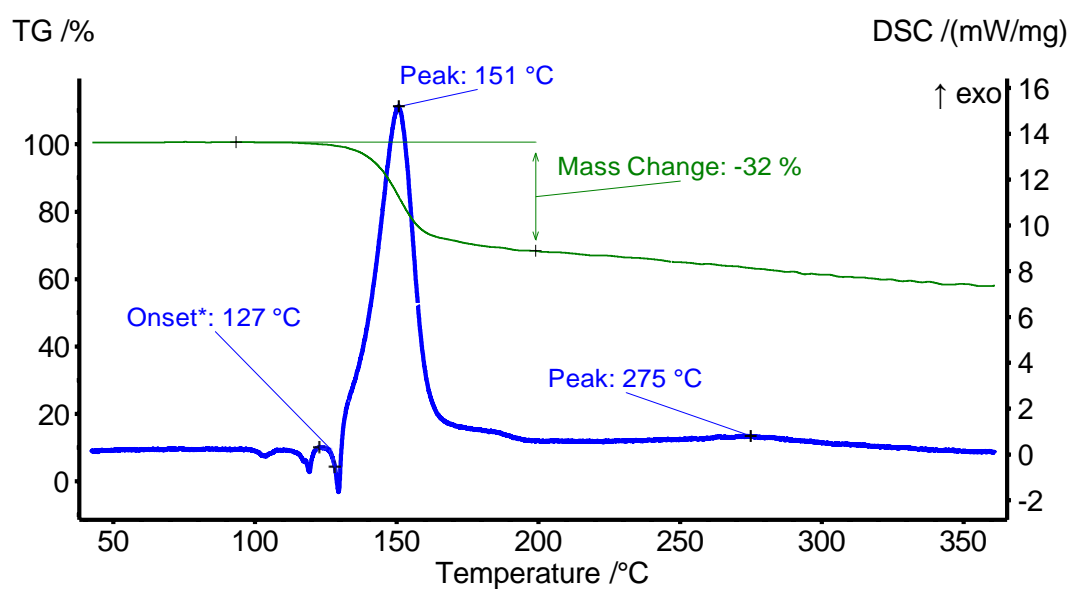

**Figure S16.** DSC (blue curve) and mass loss (TG, green curve) signals for **5** heated at 5 K min<sup>-1</sup> rate.

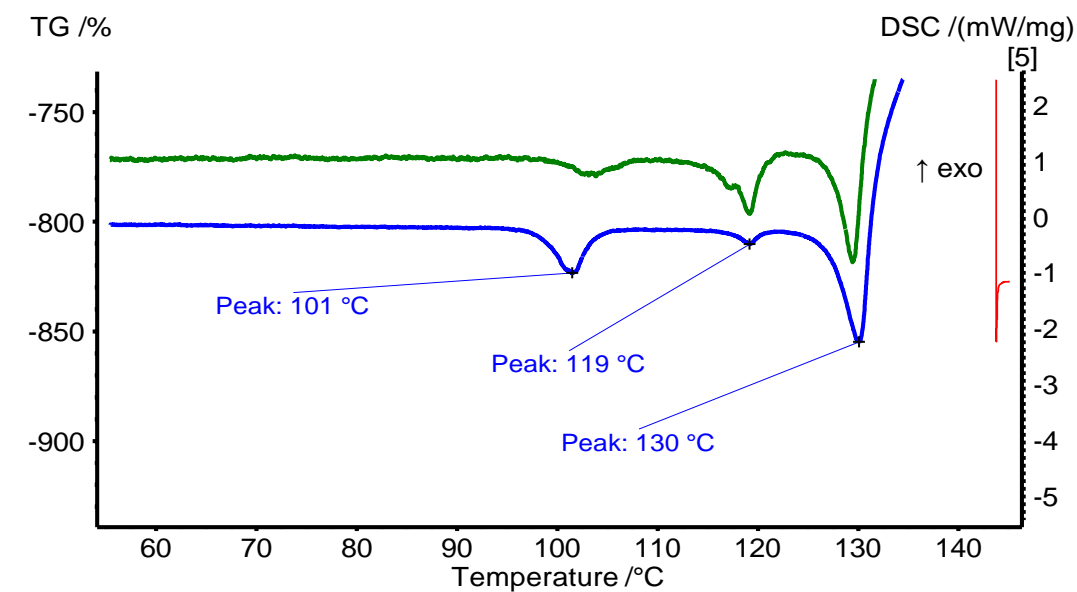

Additional 2 2022-02-08 20:32 User: jas

**Figure S17.** The magnified view of DSC (blue curve) signals for **5** heated at 5 K min<sup>-1</sup> rate: upper curve corresponds to an experiment with 0.46 mg sample mass, bottom – with 1.56 mg of the sample.

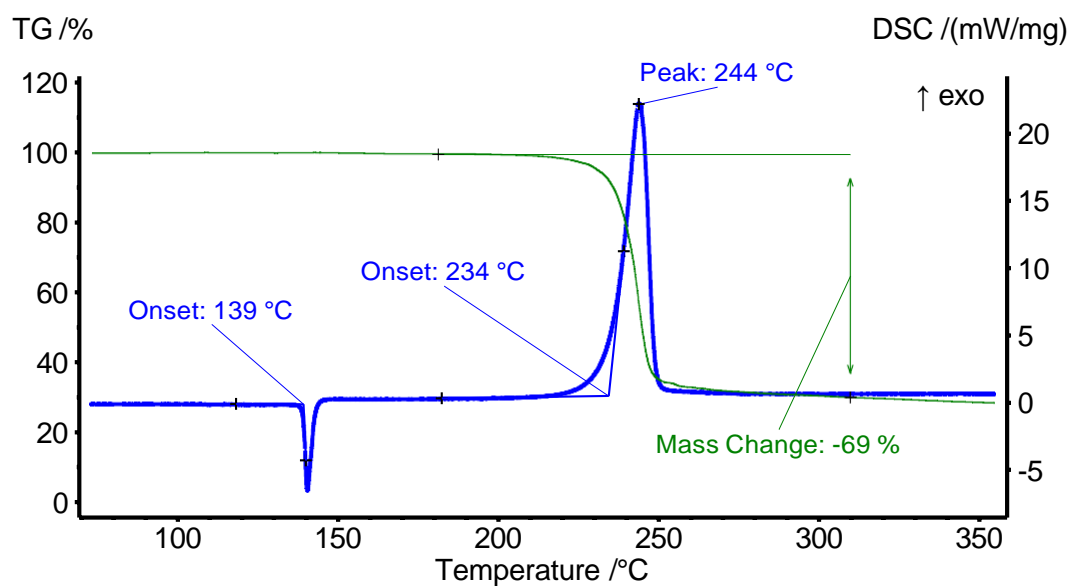

Additional 5 2022-02-08 20:41 User: jas

**Figure S18.** DSC (blue curve) and mass loss (TG, green curve) signals for **6** heated at 5 K min<sup>-1</sup> rate.

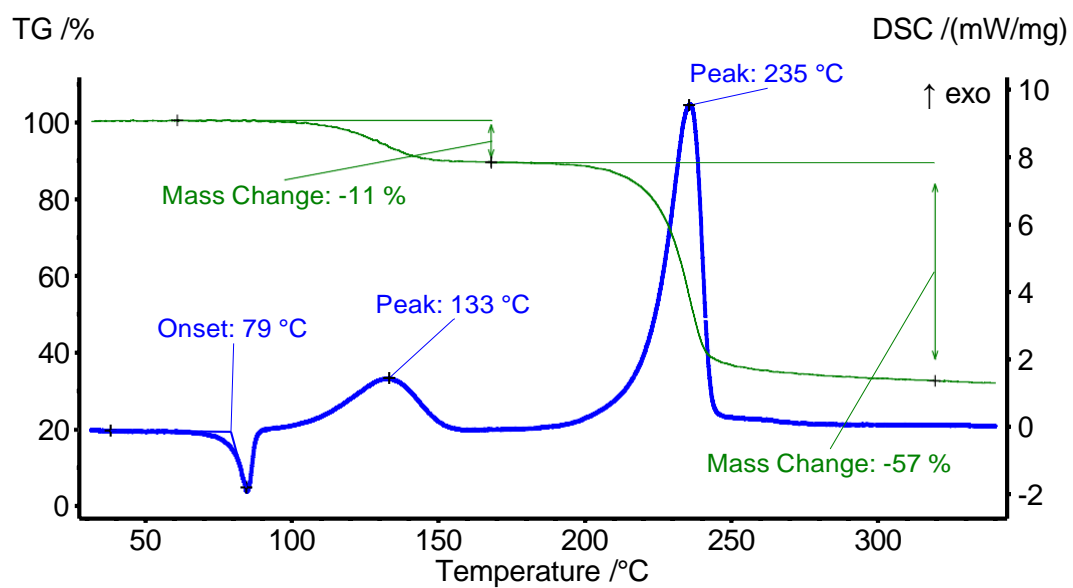

**Figure S19.** DSC (blue curve) and mass loss (TG, green curve) signals for **7** heated at 5 K min<sup>-1</sup> rate.

# NMR and IR spectra for compound 7

<sup>1</sup>H NMR (500.1 MHz, acetone-d<sub>6</sub>)

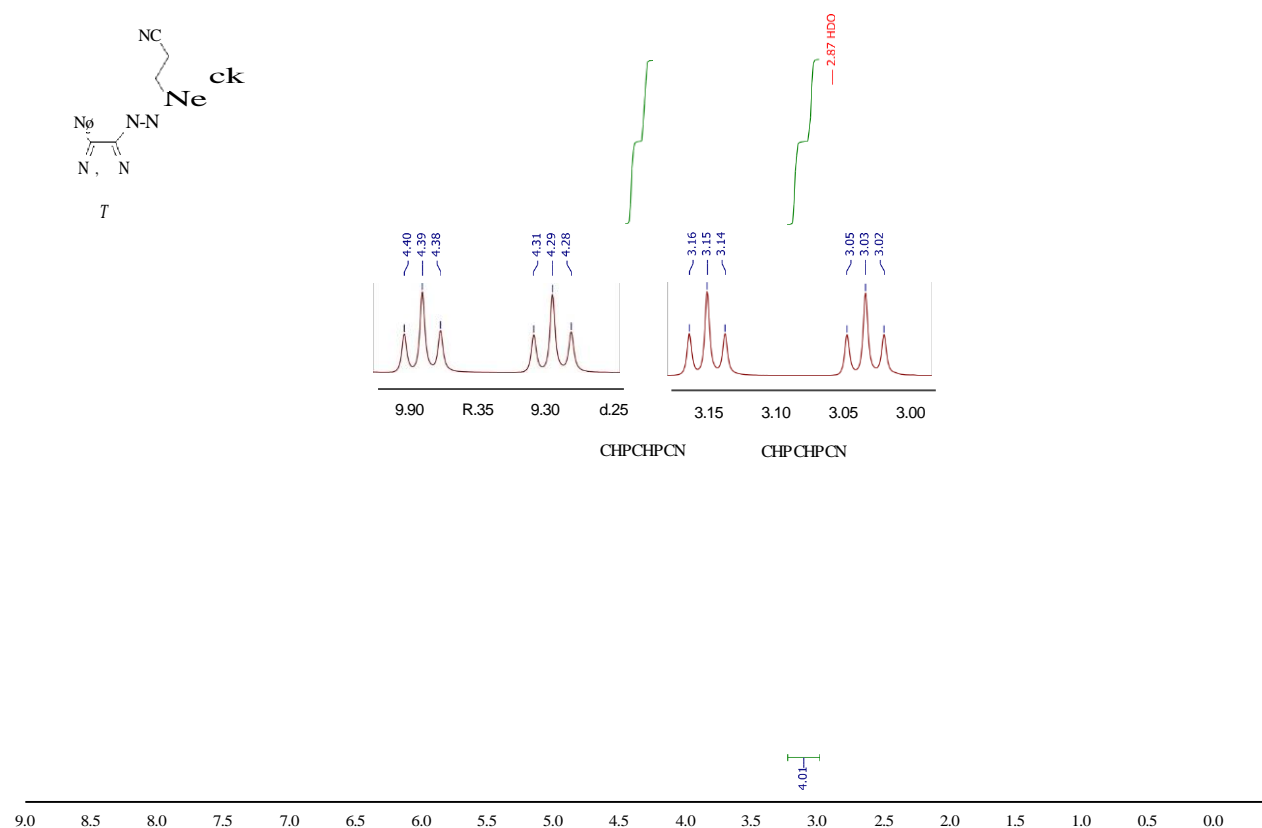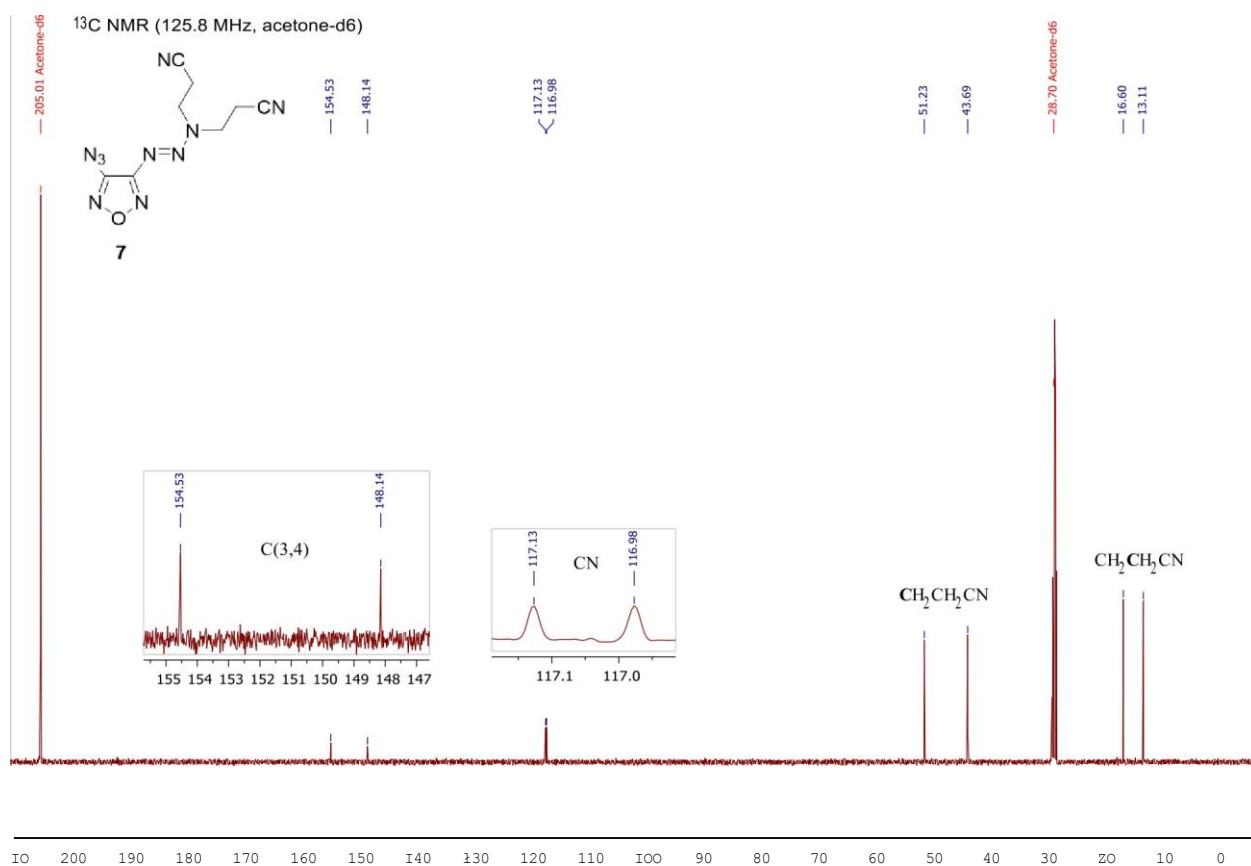

<sup>14</sup>N NMR (36.1 MHz, acetone-d<sub>6</sub>)

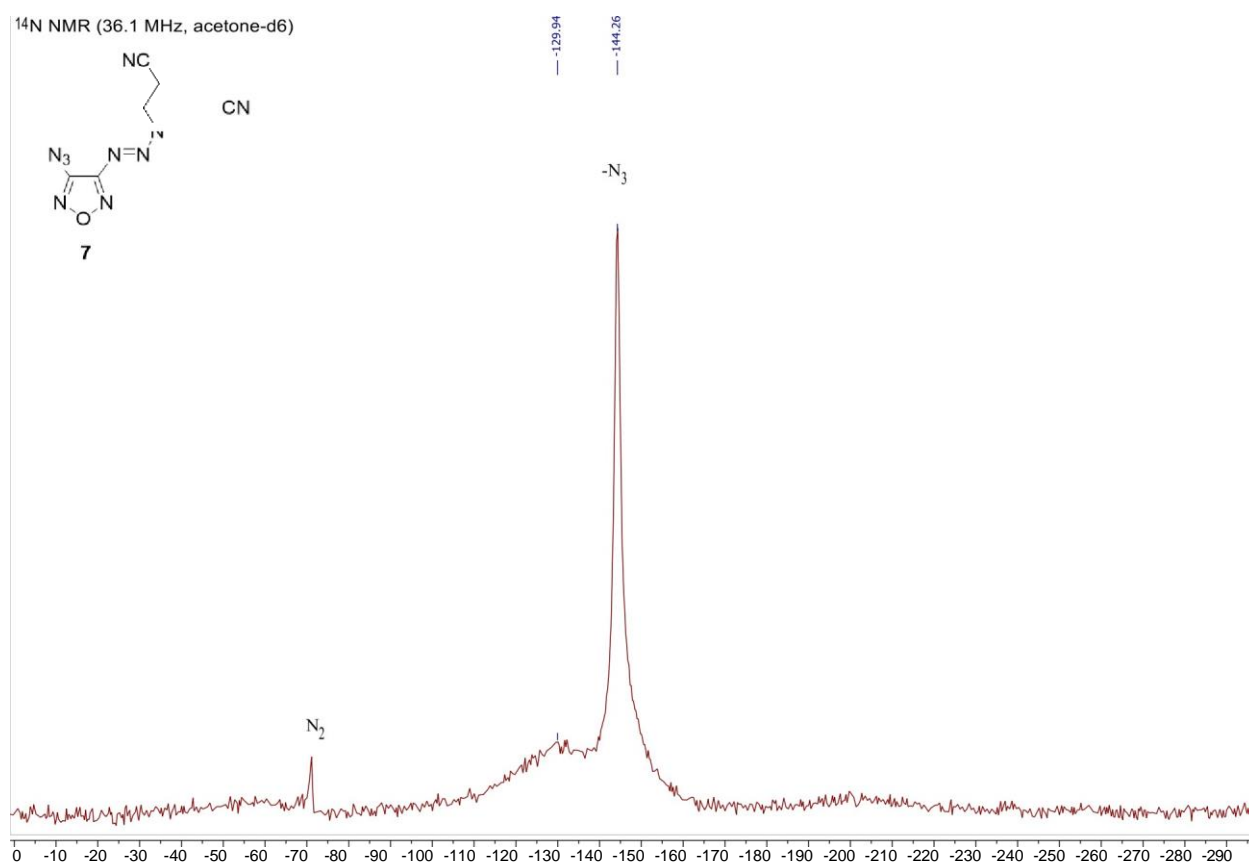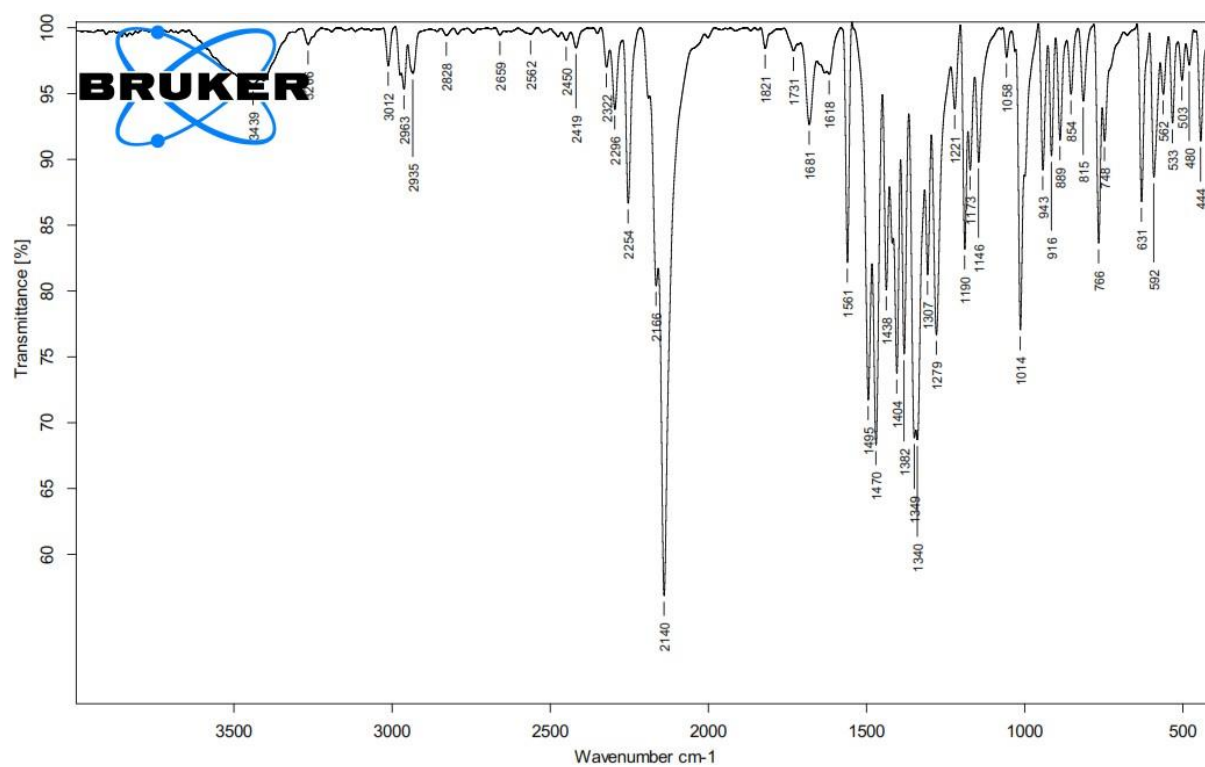

# NMR and IR spectra for compound 6

<sup>1</sup>H NMR (500.1 MHz, acetone-d<sub>6</sub>)

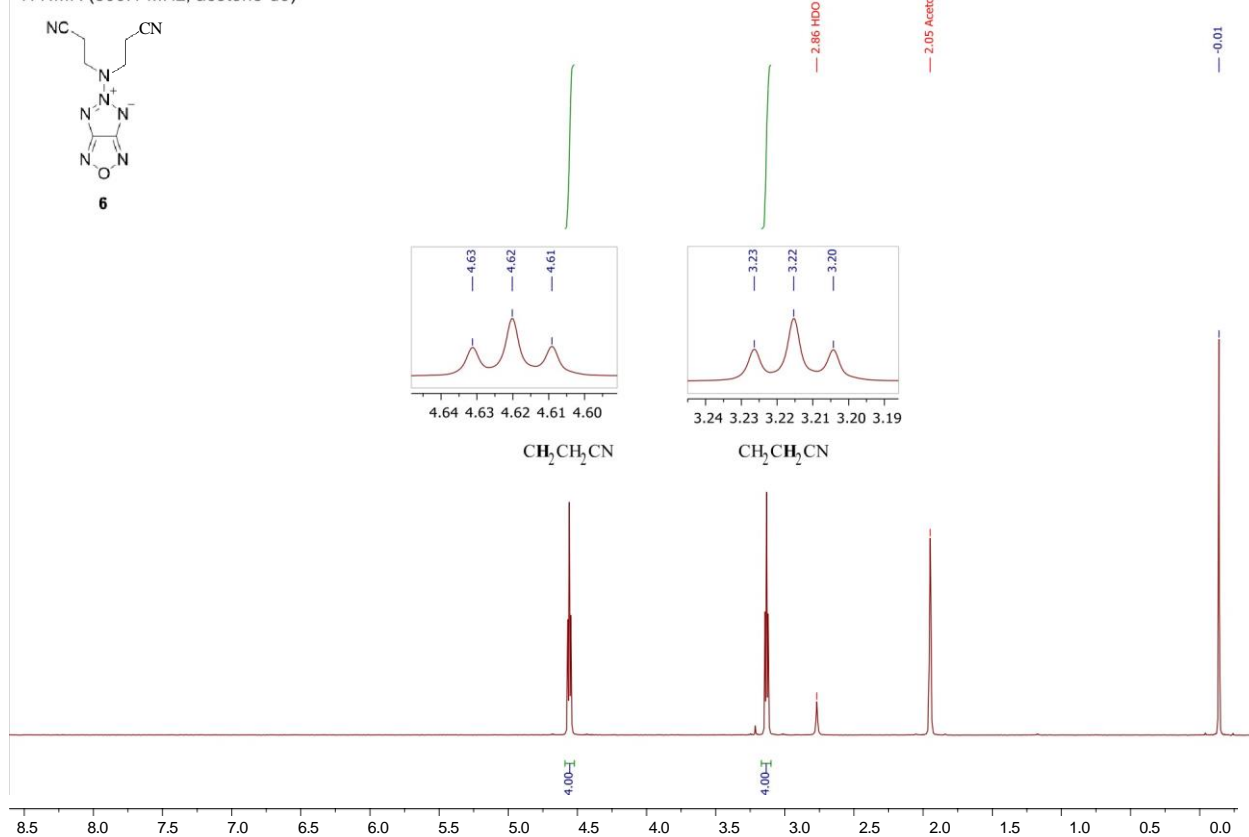

\*<sup>13</sup>C NMR (125.8 MHz, acetone-d<sub>6</sub>)

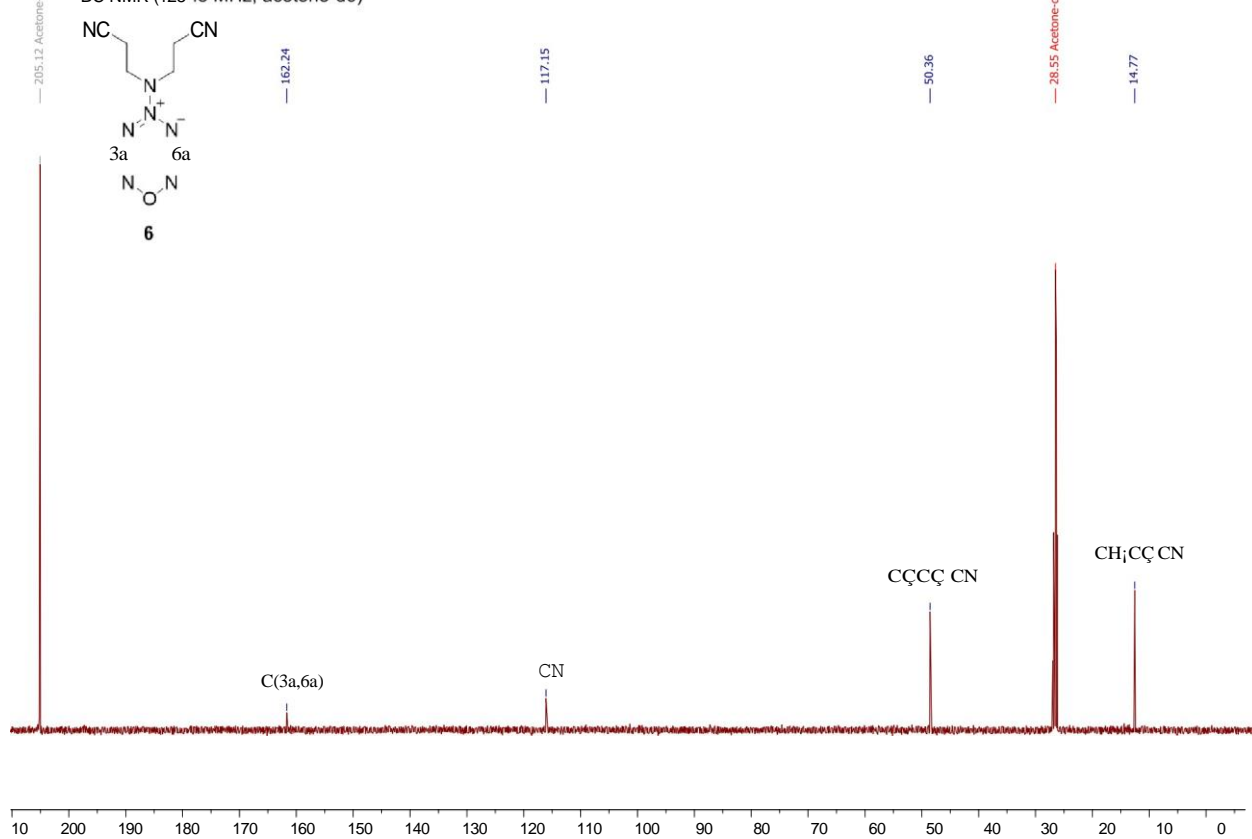



<sup>14</sup>N NMR (36.1 MHz, acetone-d<sub>6</sub>)

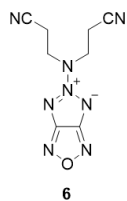

-51.58

-129.84

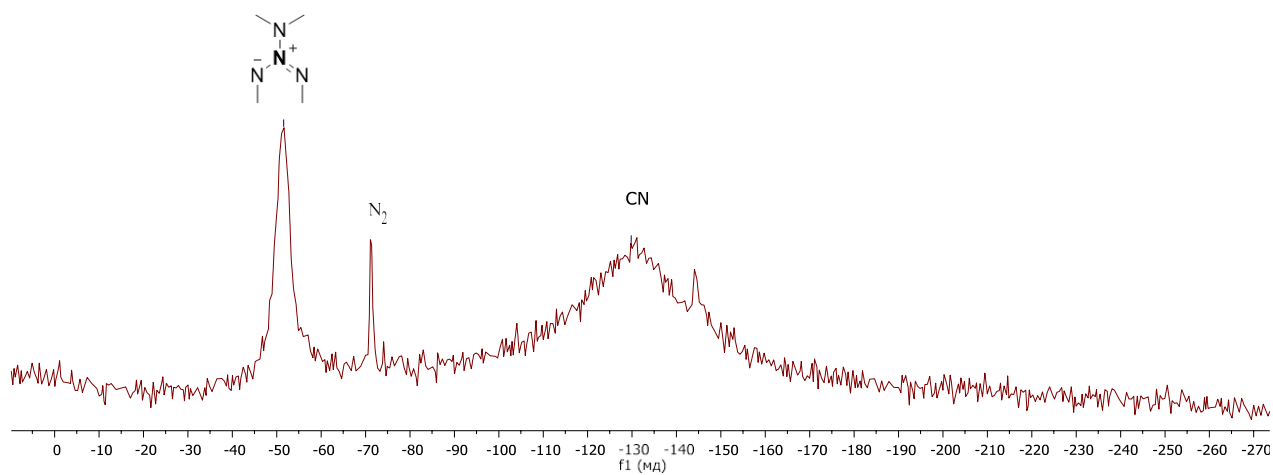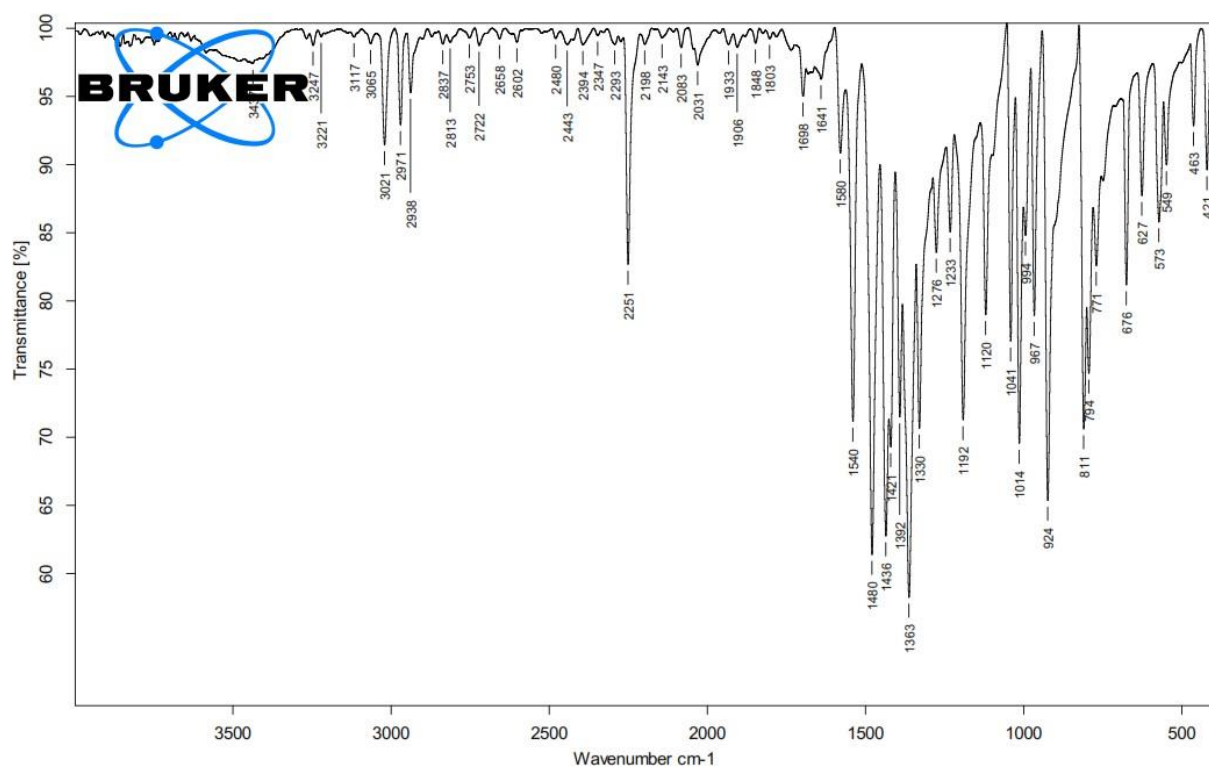

# NMR and IR spectra for compound 5

<sup>1</sup>H NMR (600.1 MHz, acetone-d<sub>6</sub>)

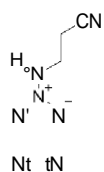

5

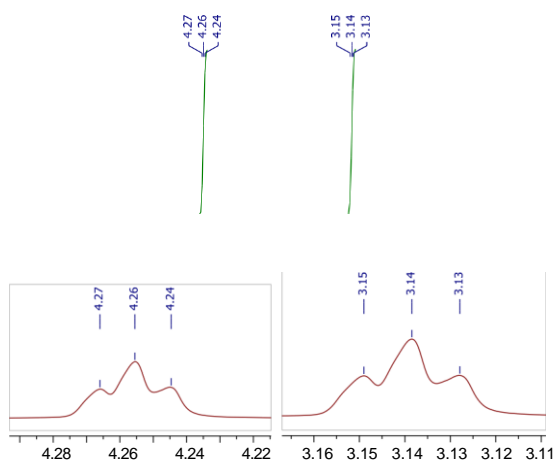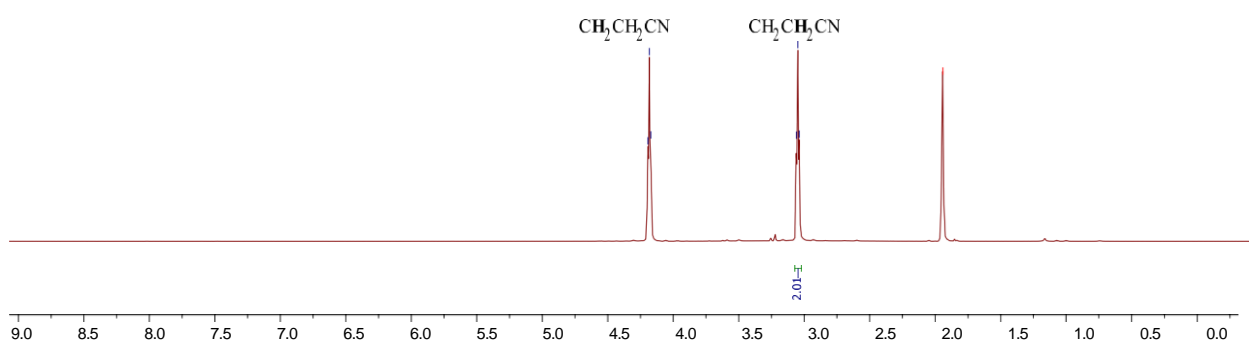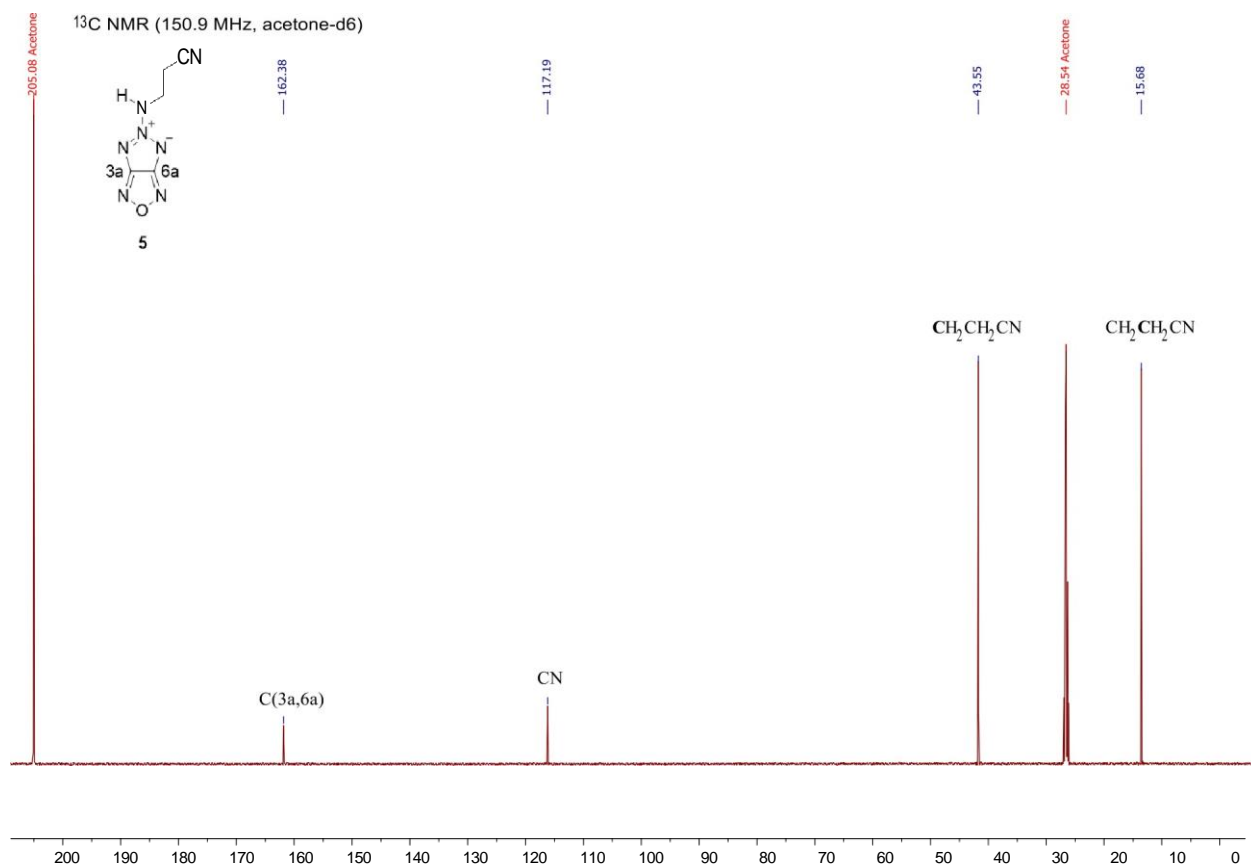

<sup>14</sup>N NMR (43.4 MHz, acetone-d<sub>6</sub>)

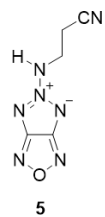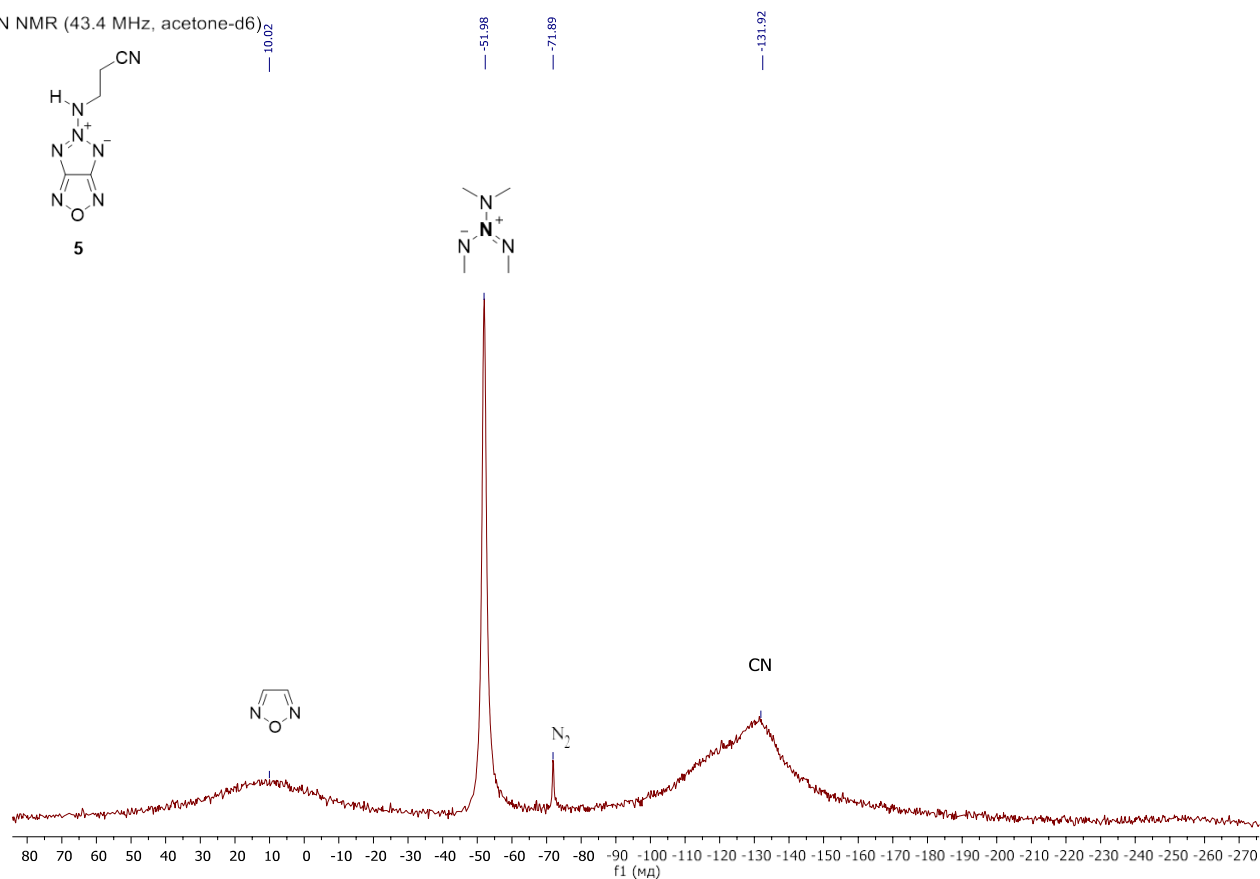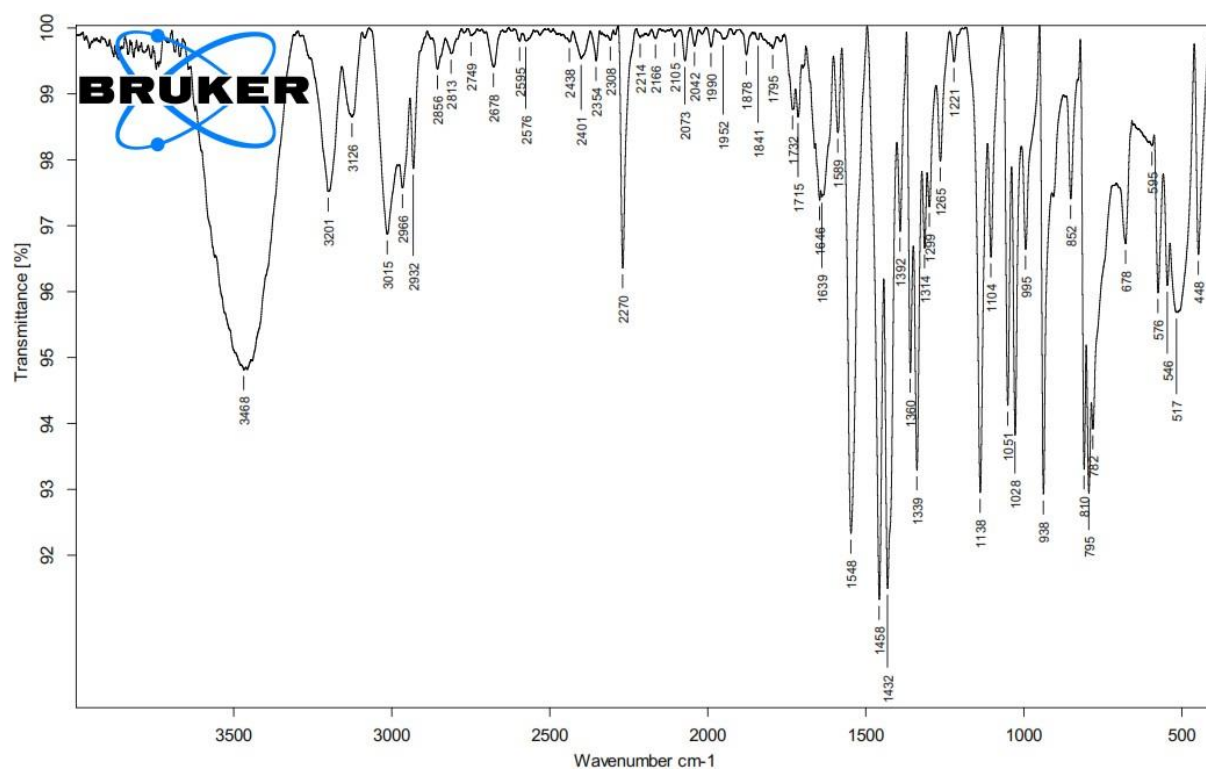

# NMR and IR spectra for compound 4b

<sup>1</sup>H NMR (500.1 MHz, acetone-d<sub>6</sub>)

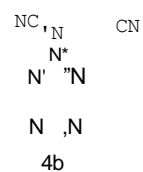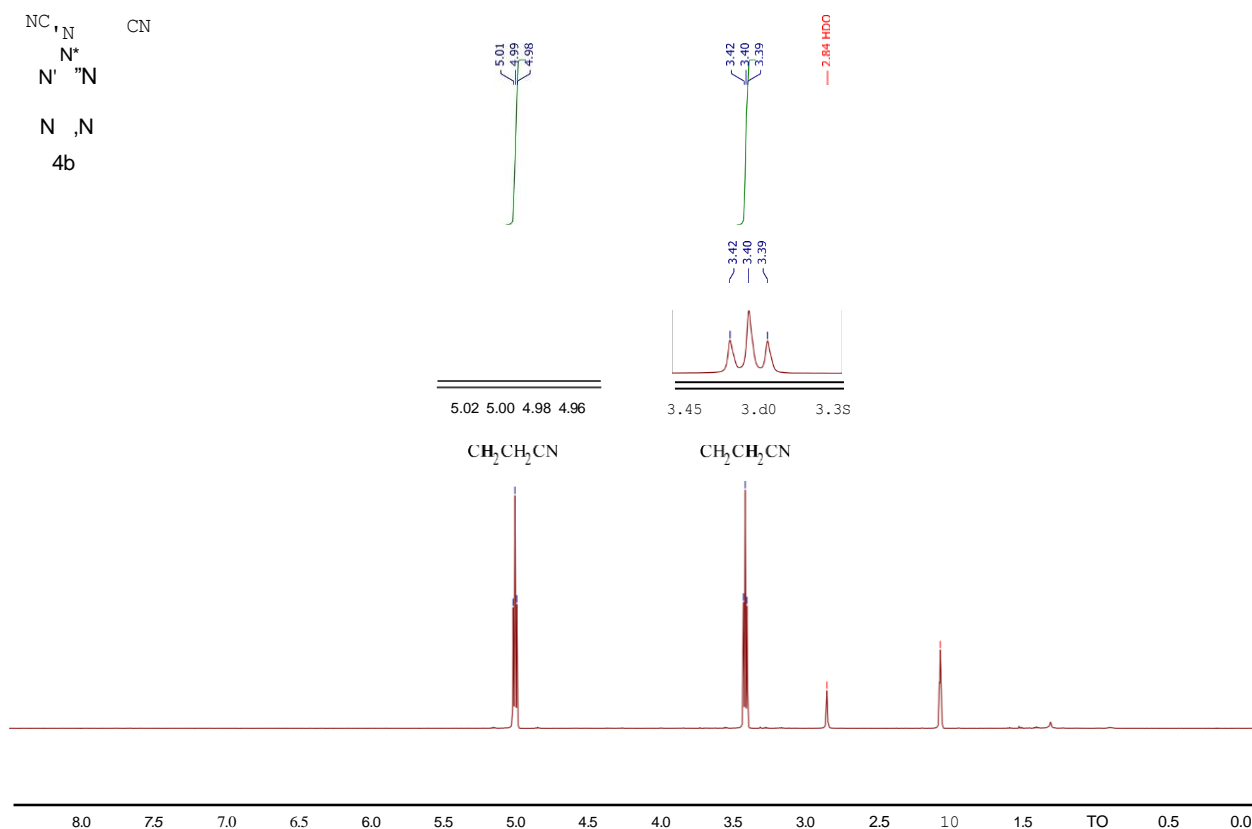

\*<sup>13</sup>C NMR (125.8 MHz, acetone-d<sub>6</sub>)

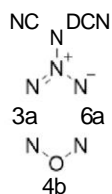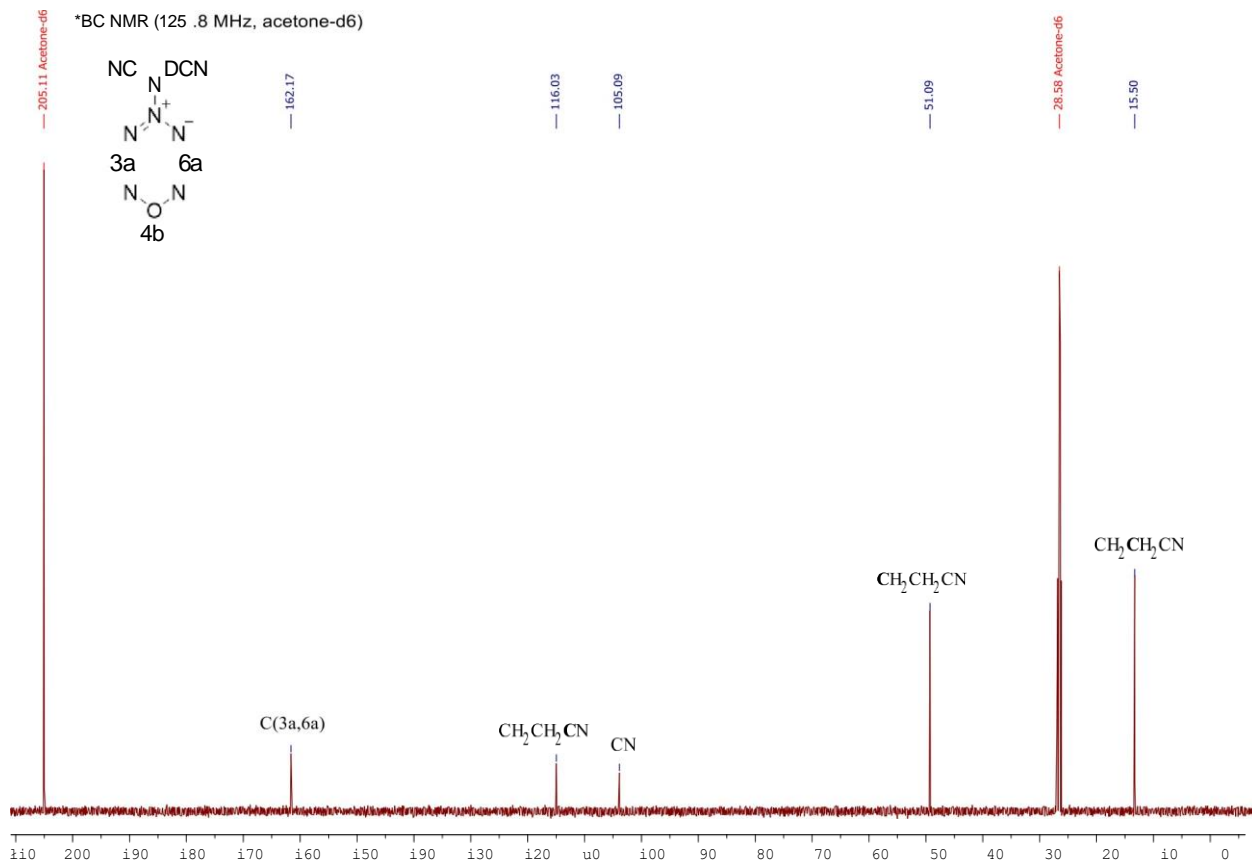

$^{14}\text{N}$  NMR (36.1 MHz, acetone- $d_6$ )

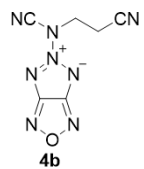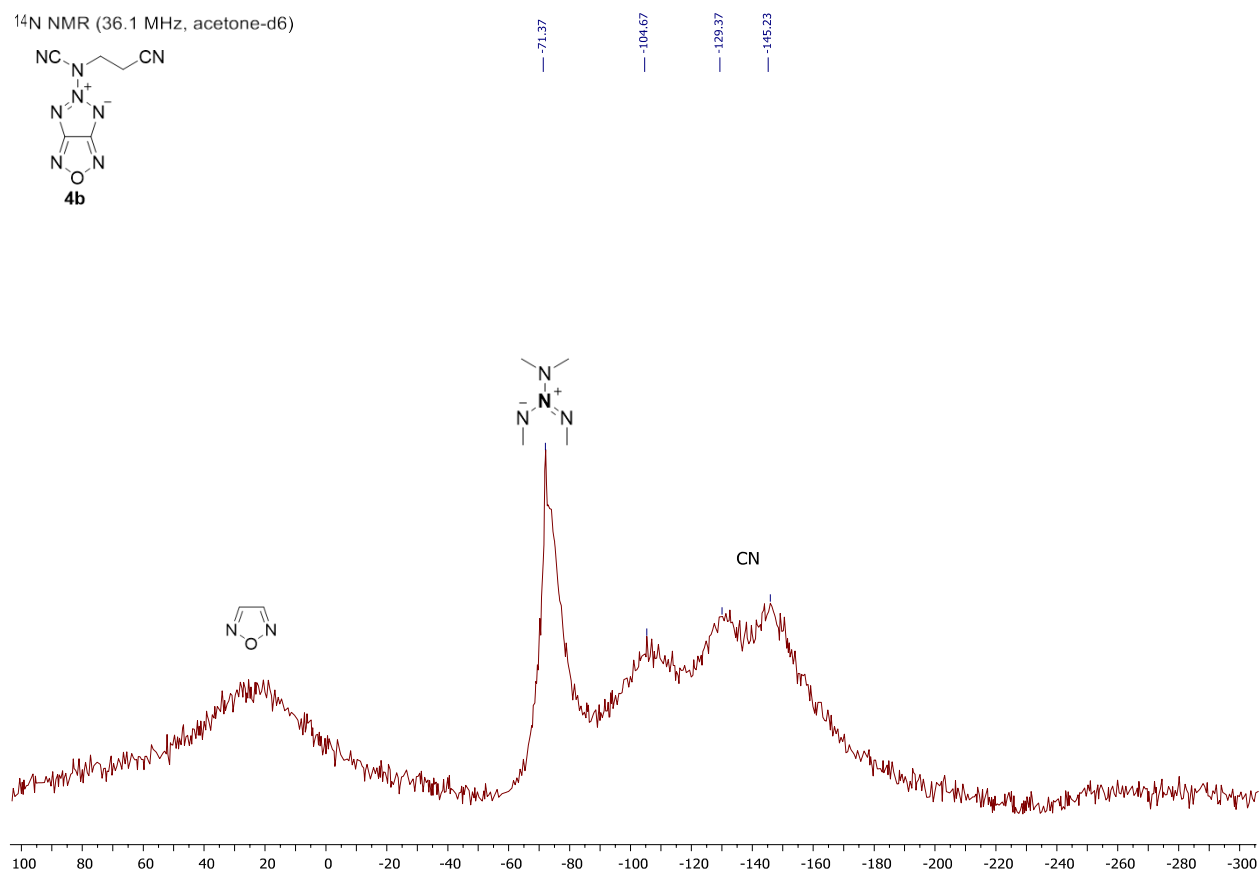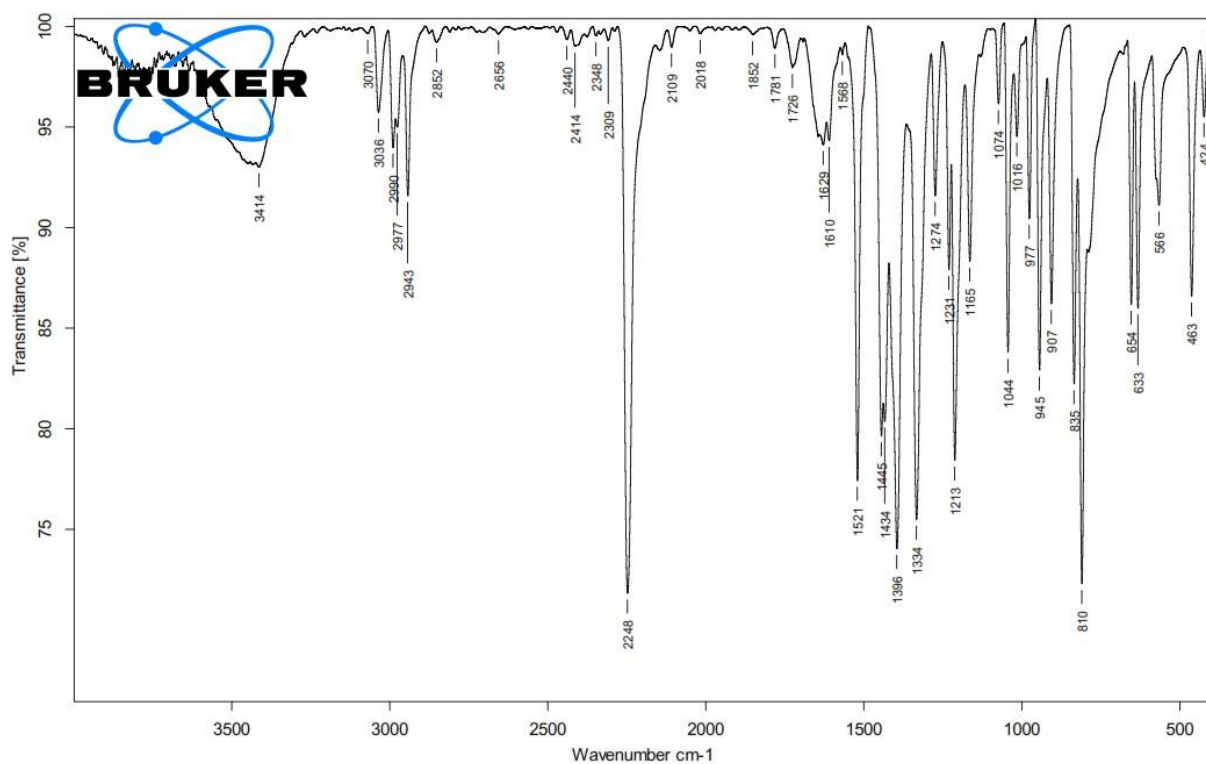

# NMR and IR spectra for compound 4c

<sup>1</sup>H NMR (500.1 MHz, acetone-d<sub>6</sub>)

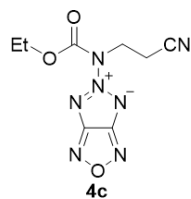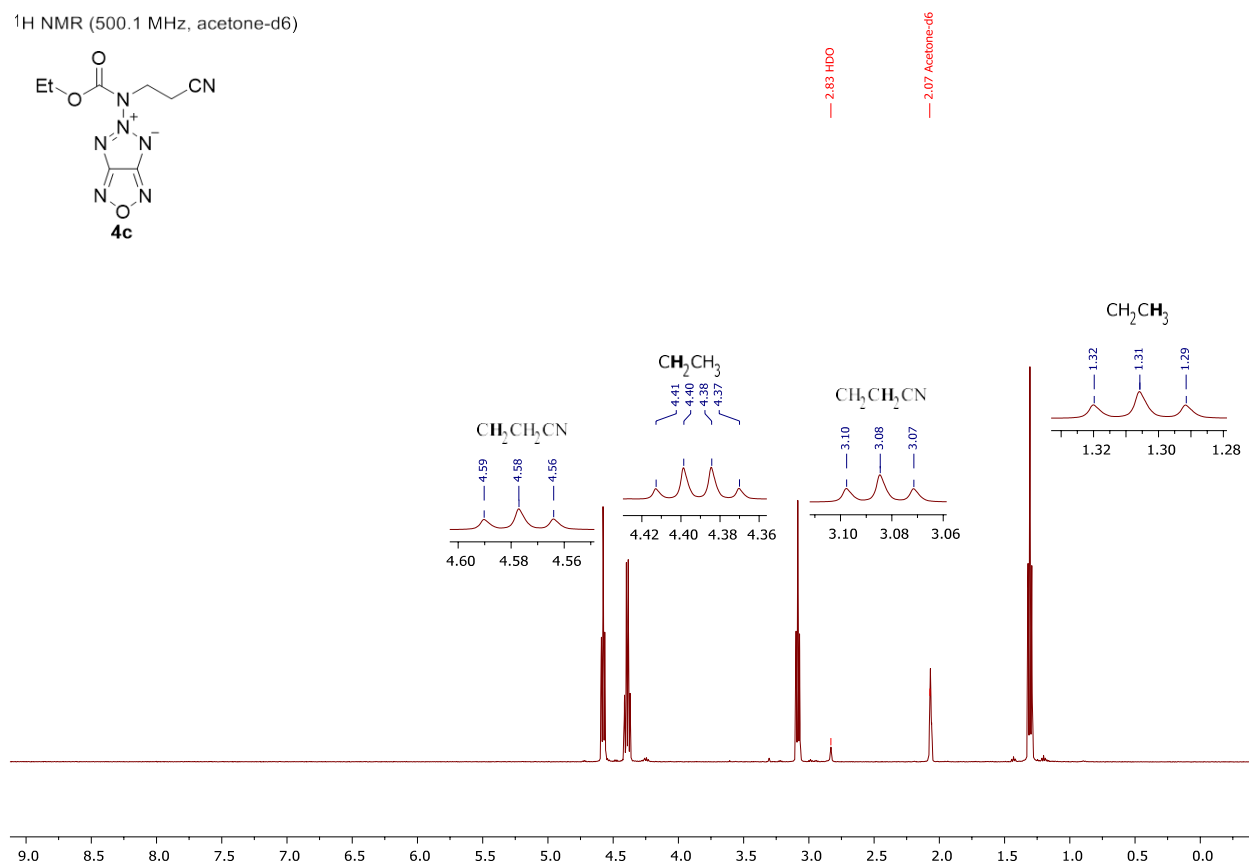

<sup>13</sup>C NMR (125.8 MHz, acetone-d<sub>6</sub>)

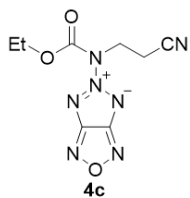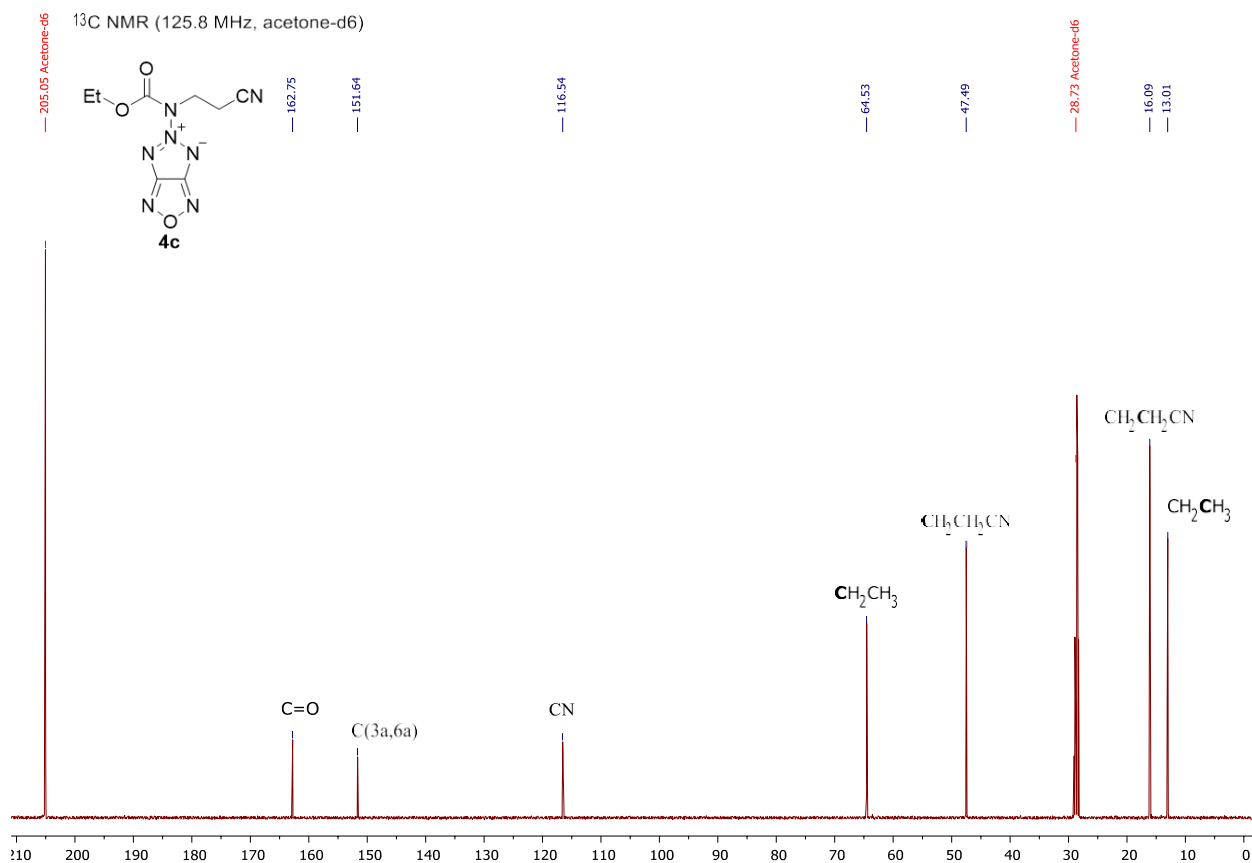

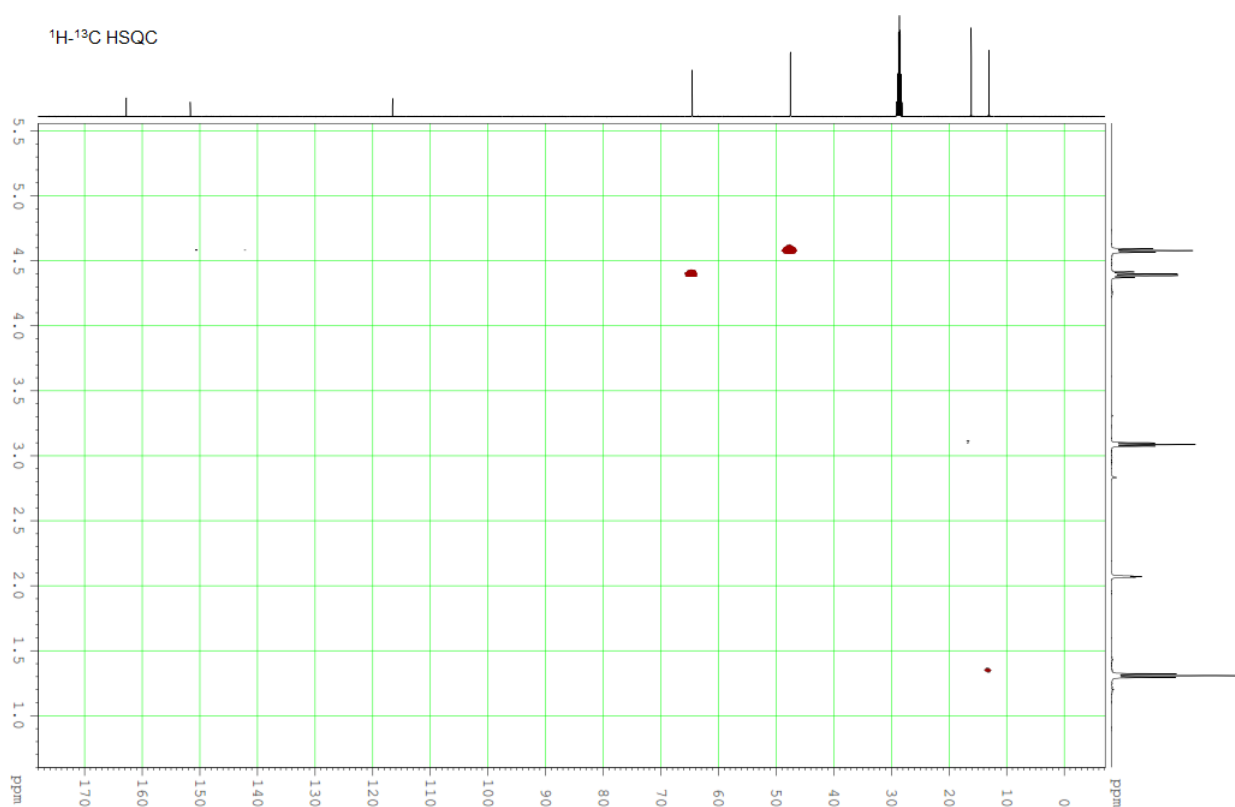

<sup>14</sup>N NMR (36.1 MHz, acetone-d<sub>6</sub>)

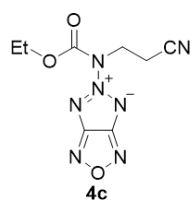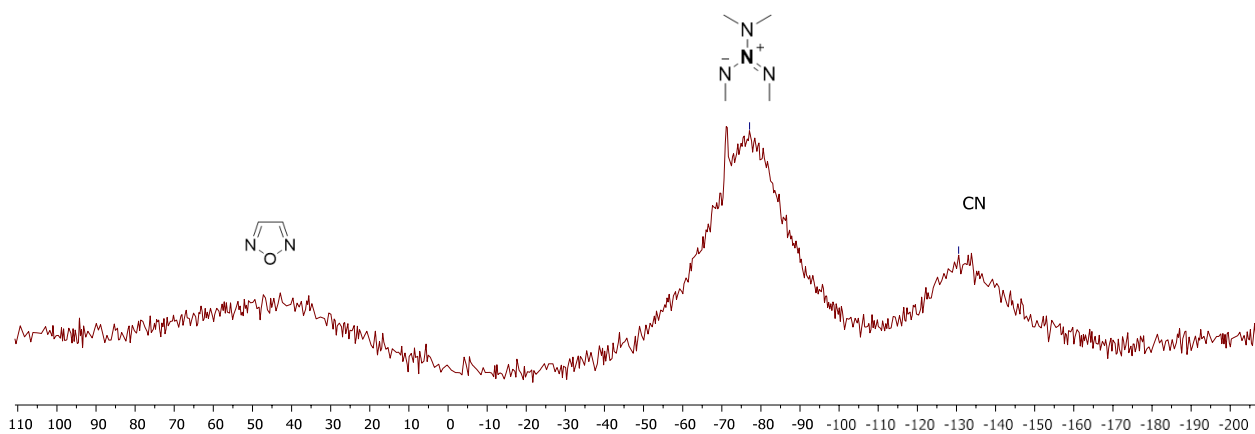

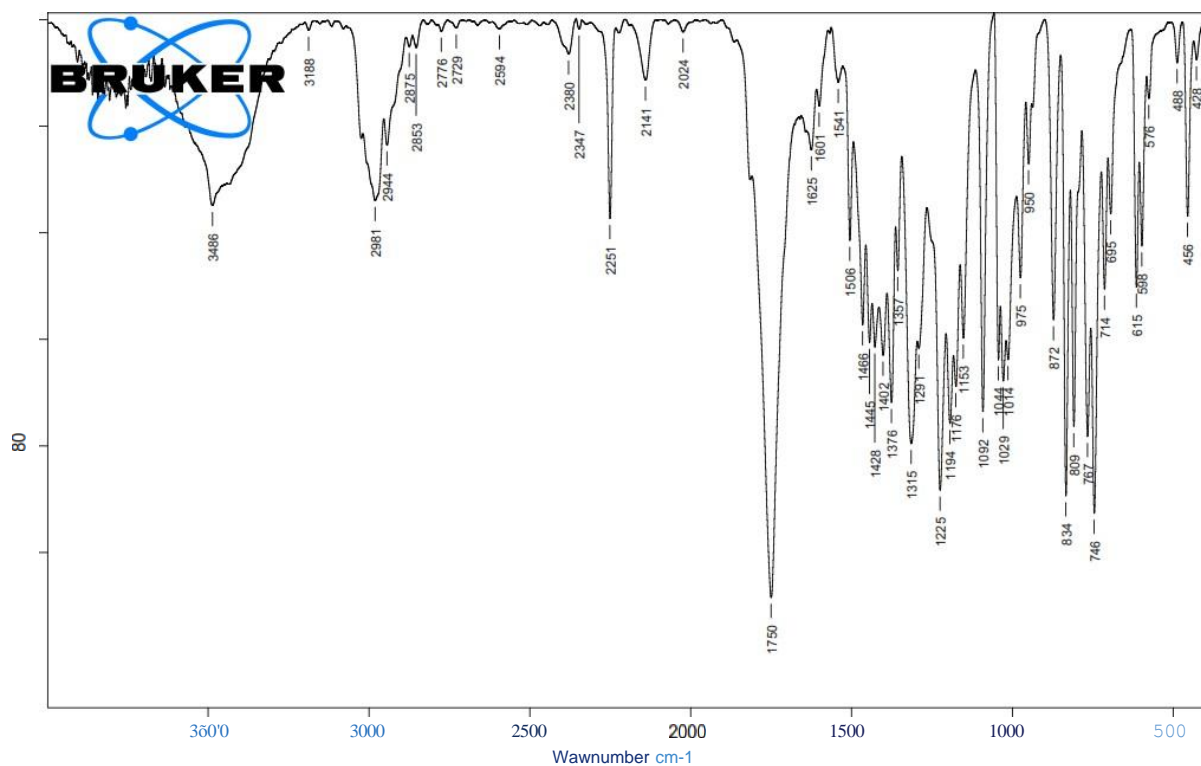



# NMR and IR spectra for compound 3a

BC NMR (125.8 MHz, DMSO-d6)

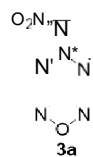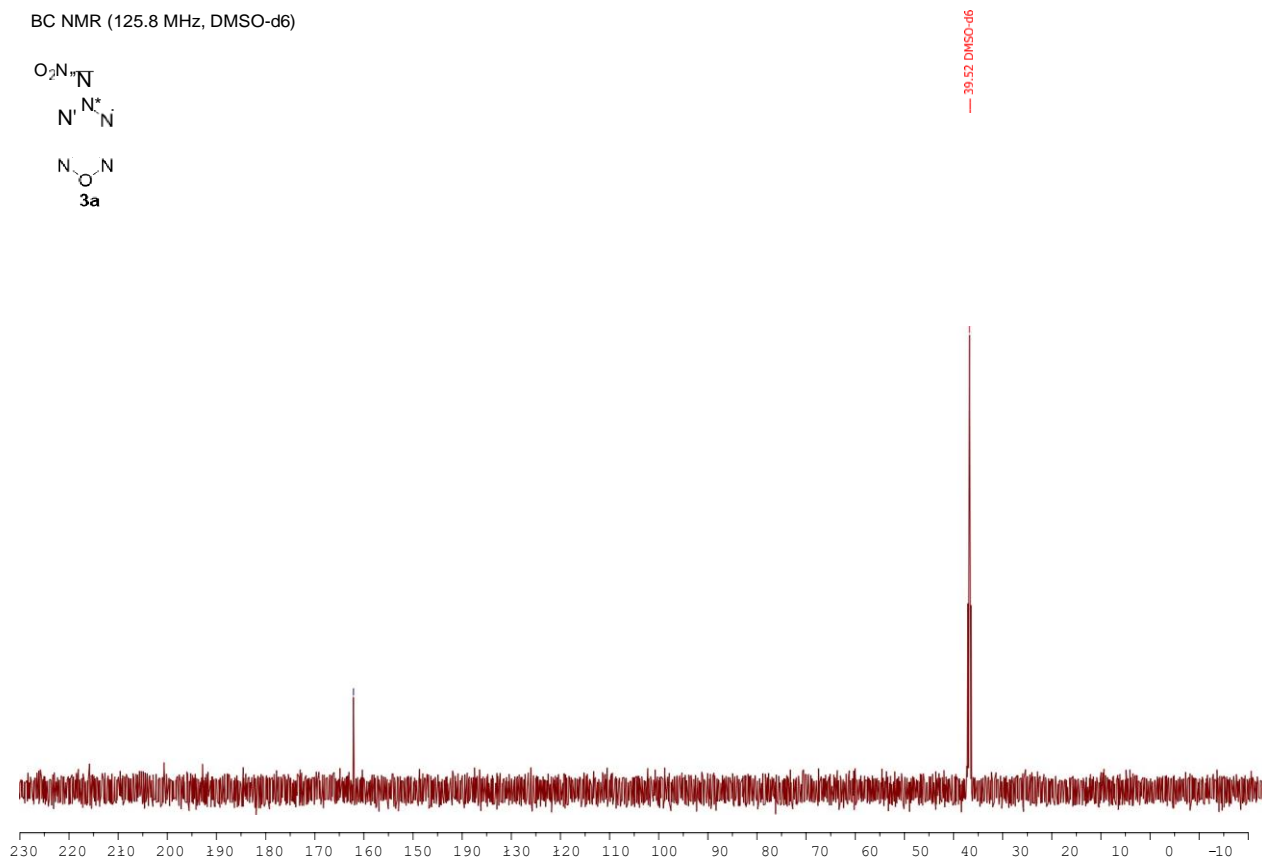

$^{14}\text{N}$  NMR (36.1 MHz, DMSO-d6)

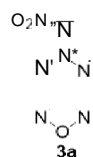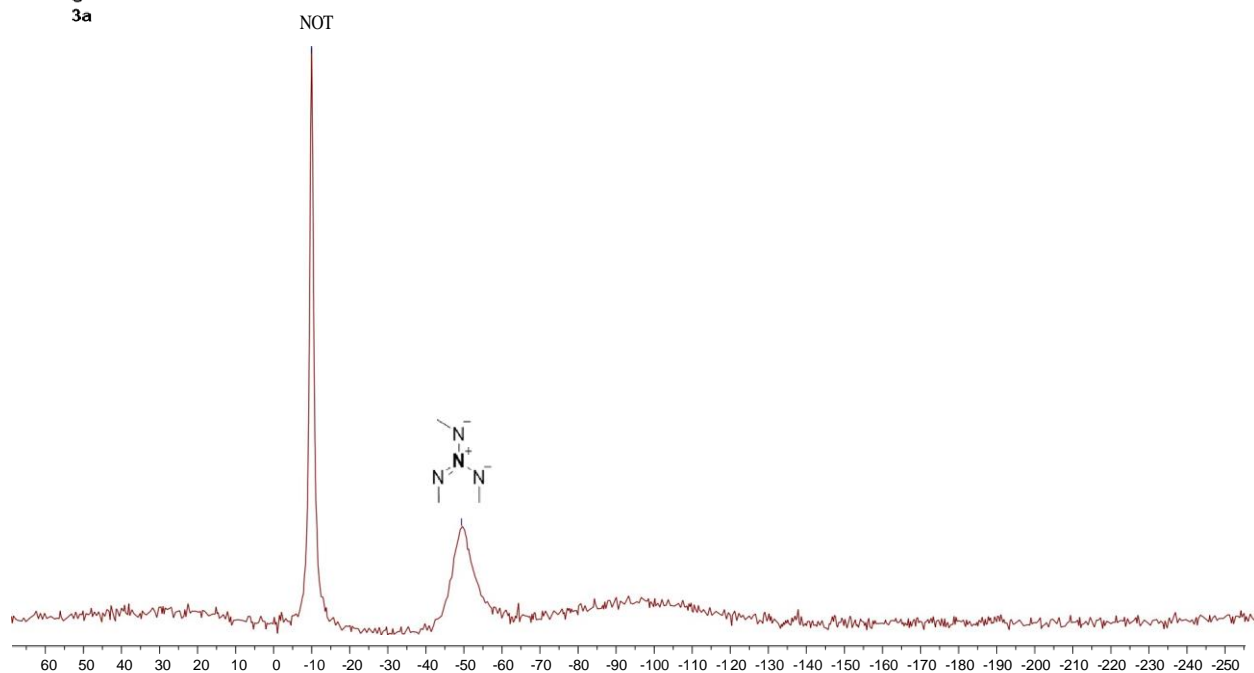

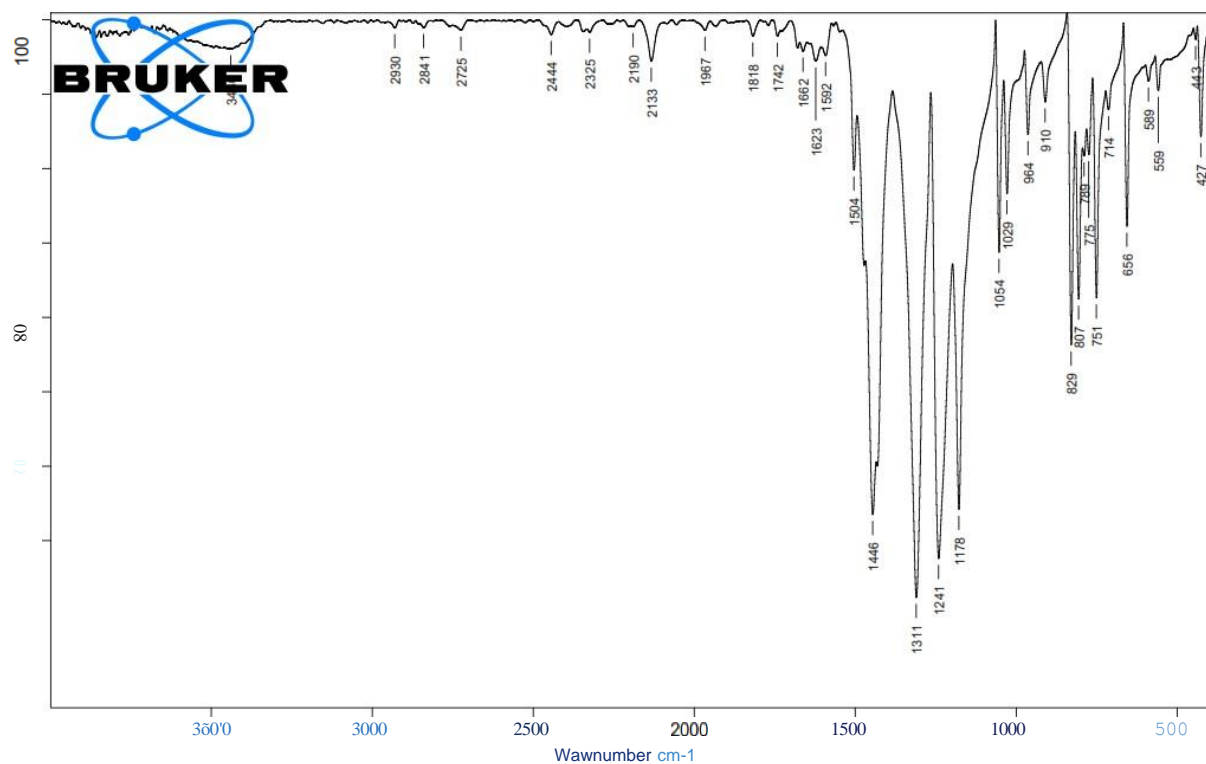

# NMR spectra for compound 3a – MeCN complex

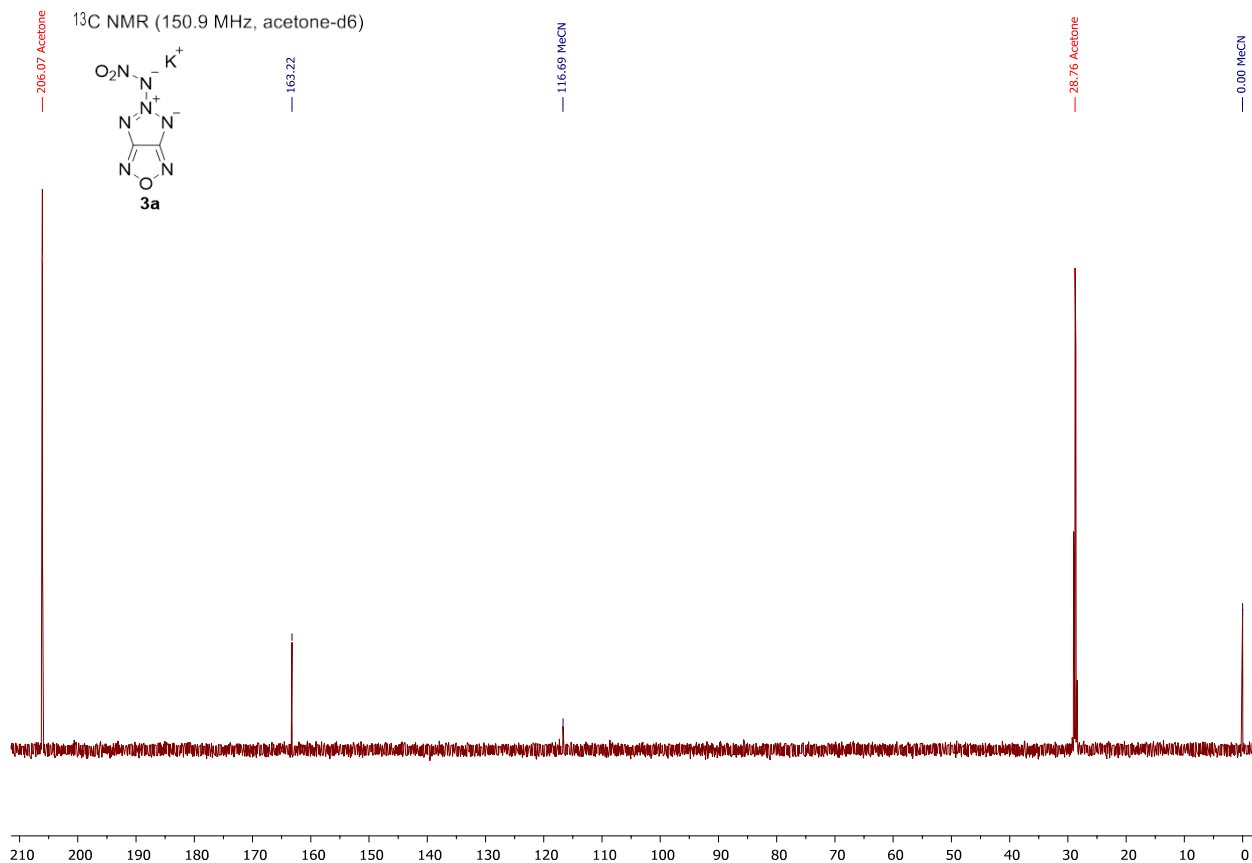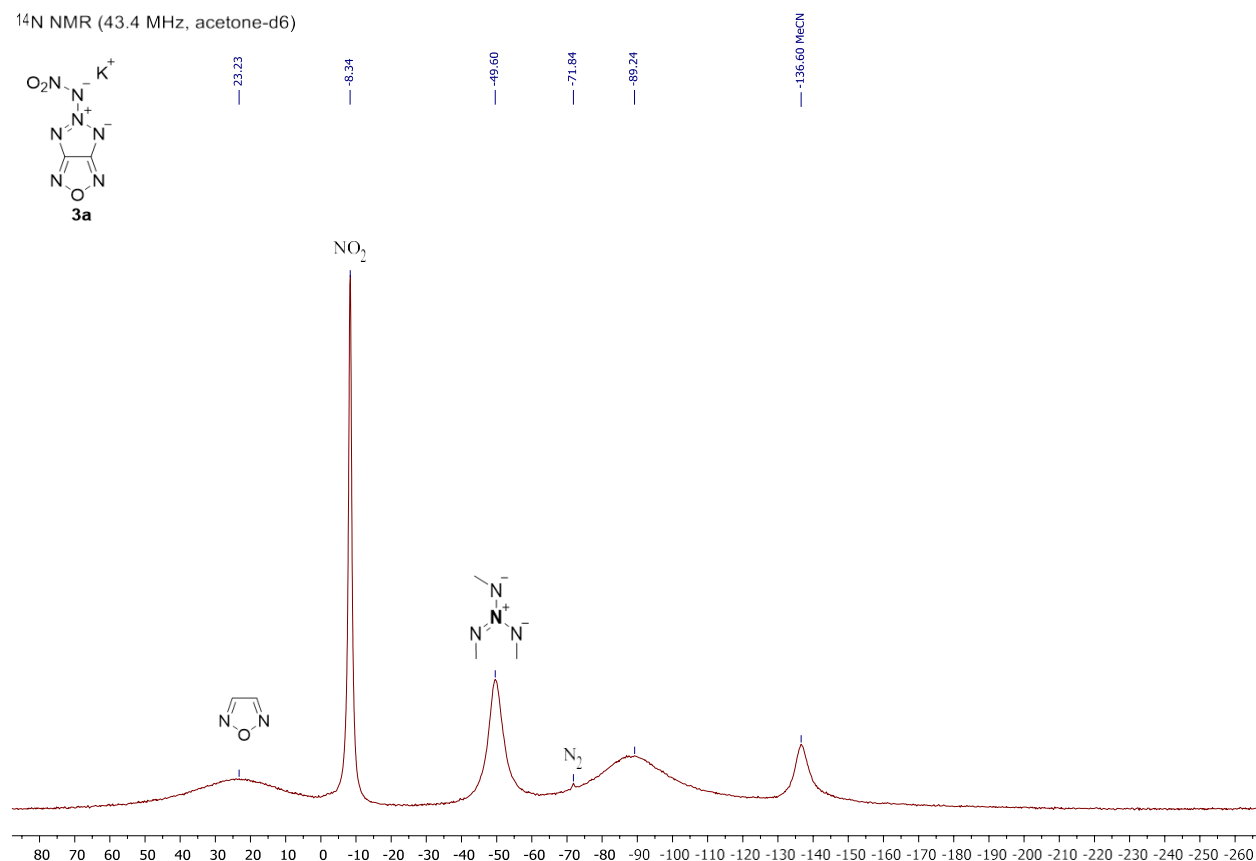

$^{15}\text{N}$  NMR (60.8 MHz, acetone- $d_6$ )

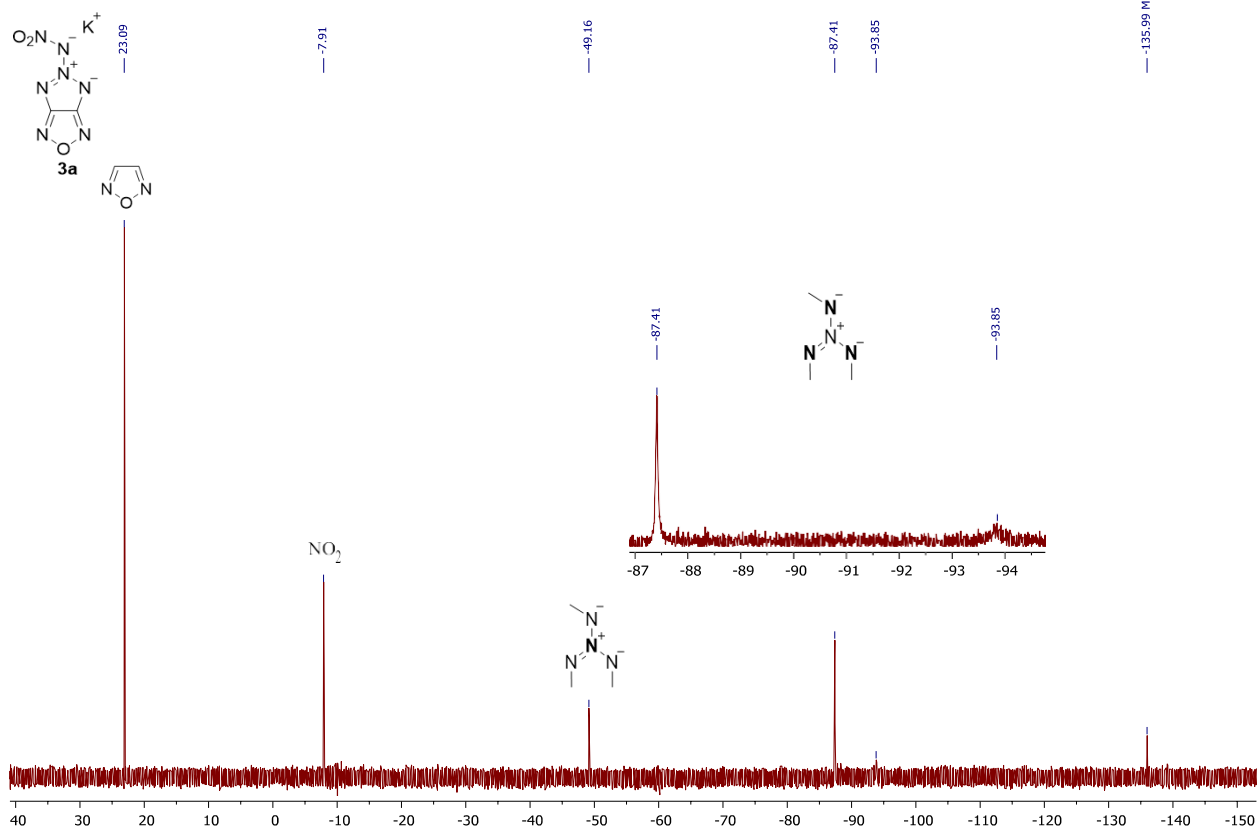

# NMR and IR spectra for compound 3b

<sup>13</sup>C NMR (150.9 MHz, methanol-d<sub>4</sub>)

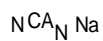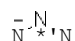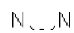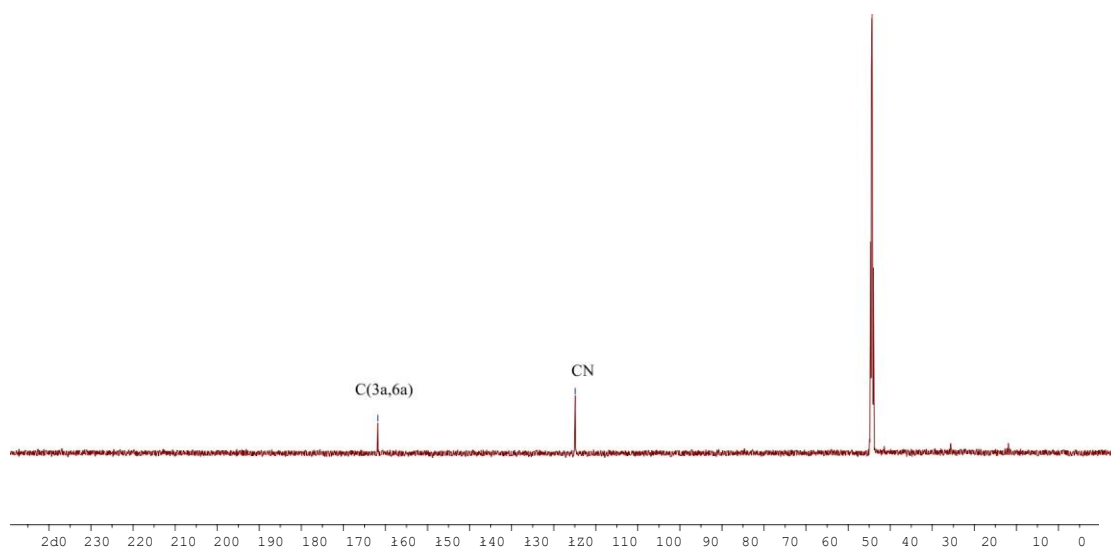

<sup>14</sup>N NMR (36.1 MHz, methanol-d<sub>4</sub>)

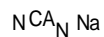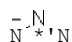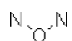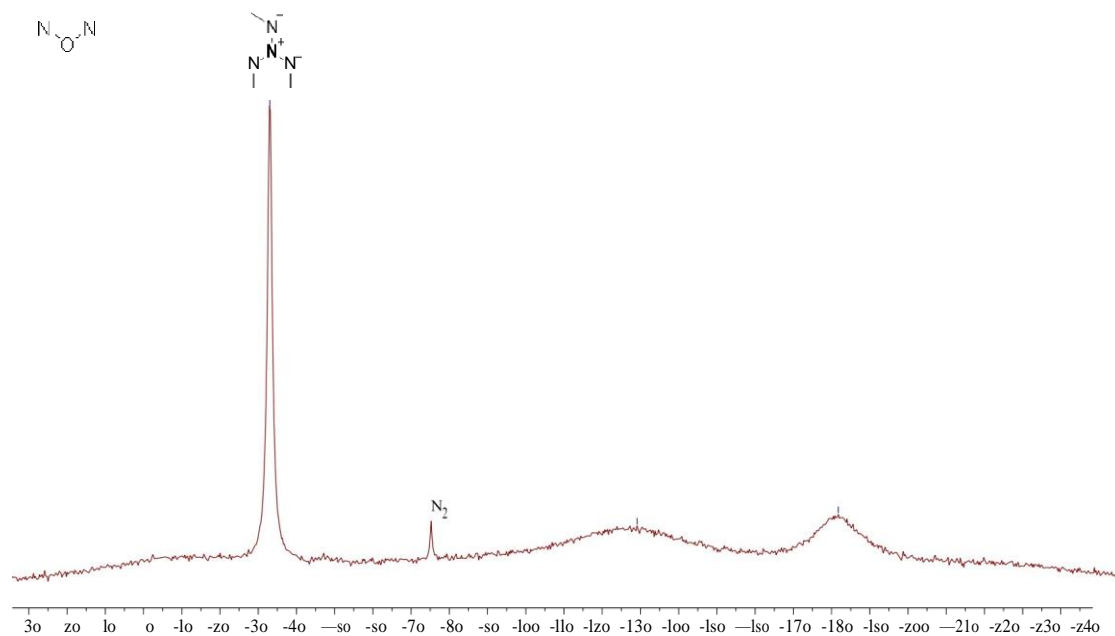

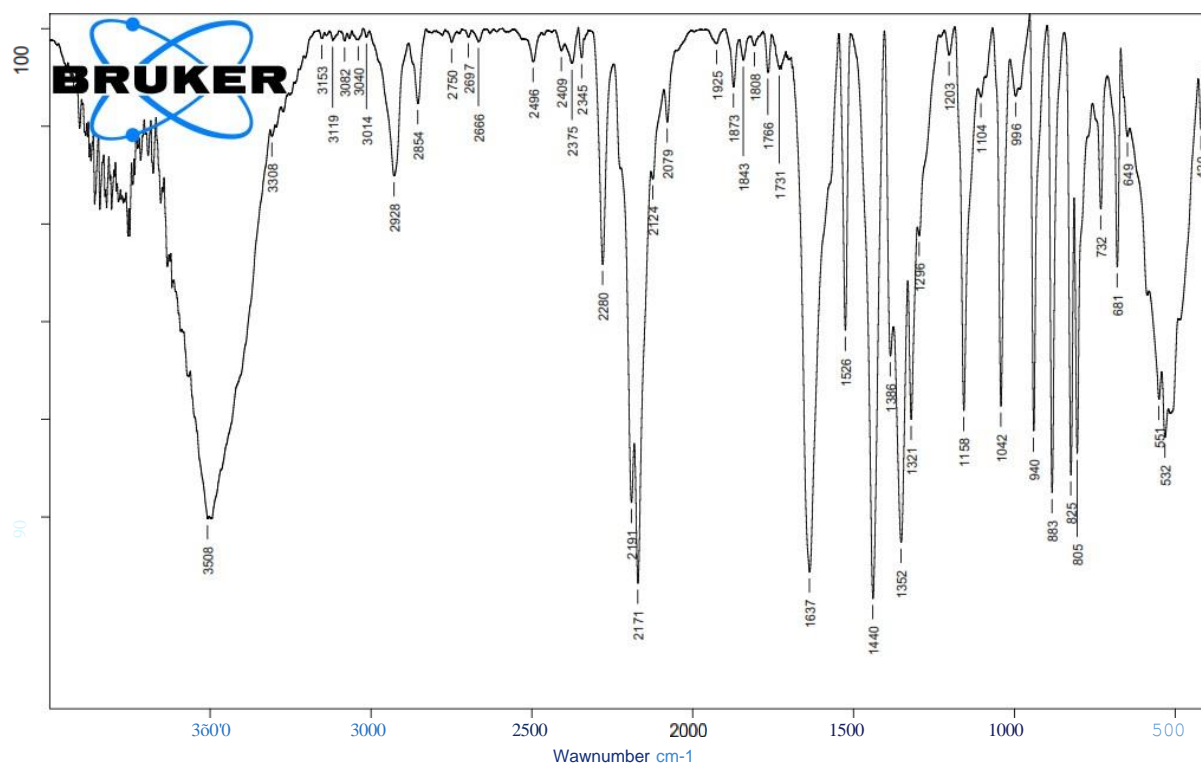

# NMR and IR spectra for compound 3c

<sup>1</sup>H NMR (600.1 MHz, DMSO-d<sub>6</sub>)

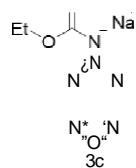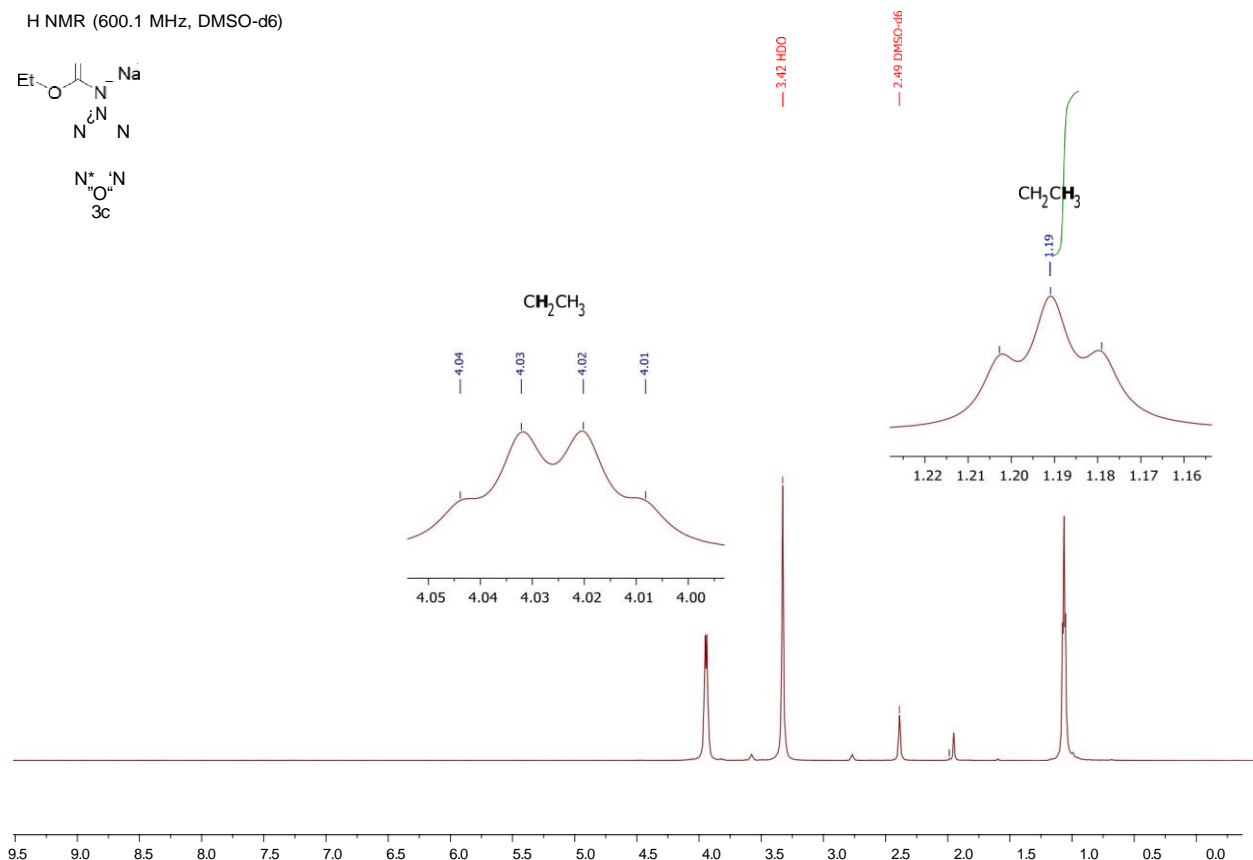

<sup>13</sup>C NMR (150.9 MHz, DMSO-d<sub>6</sub>)

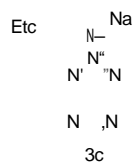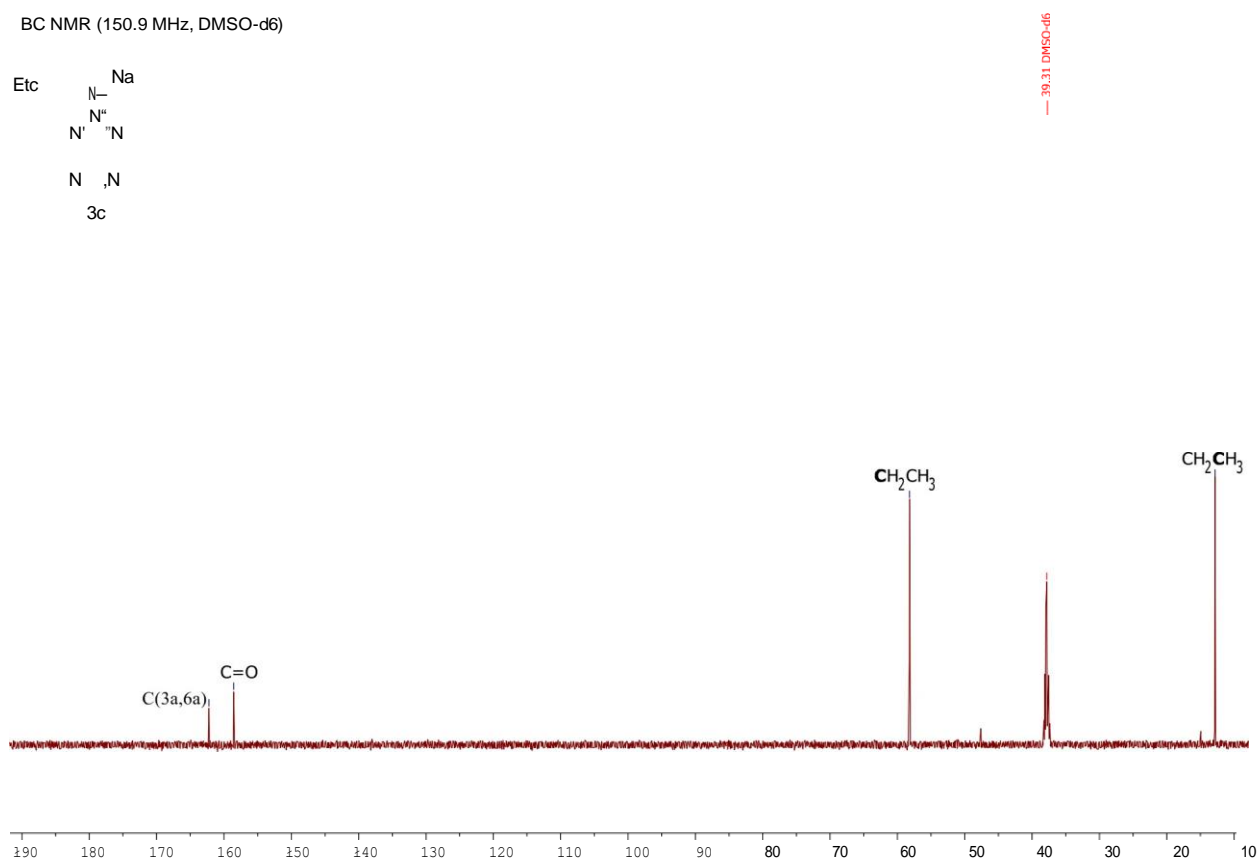

<sup>14</sup>N NMR (43.4 MHz, DMSO-d<sub>6</sub>)

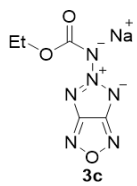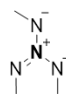

-29.36

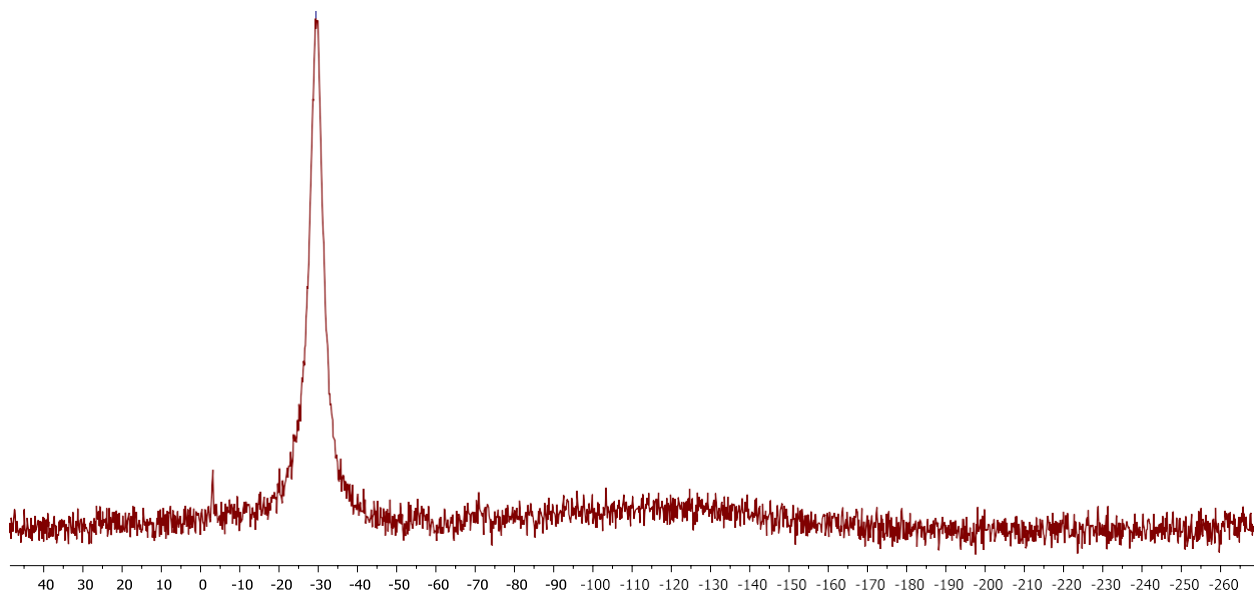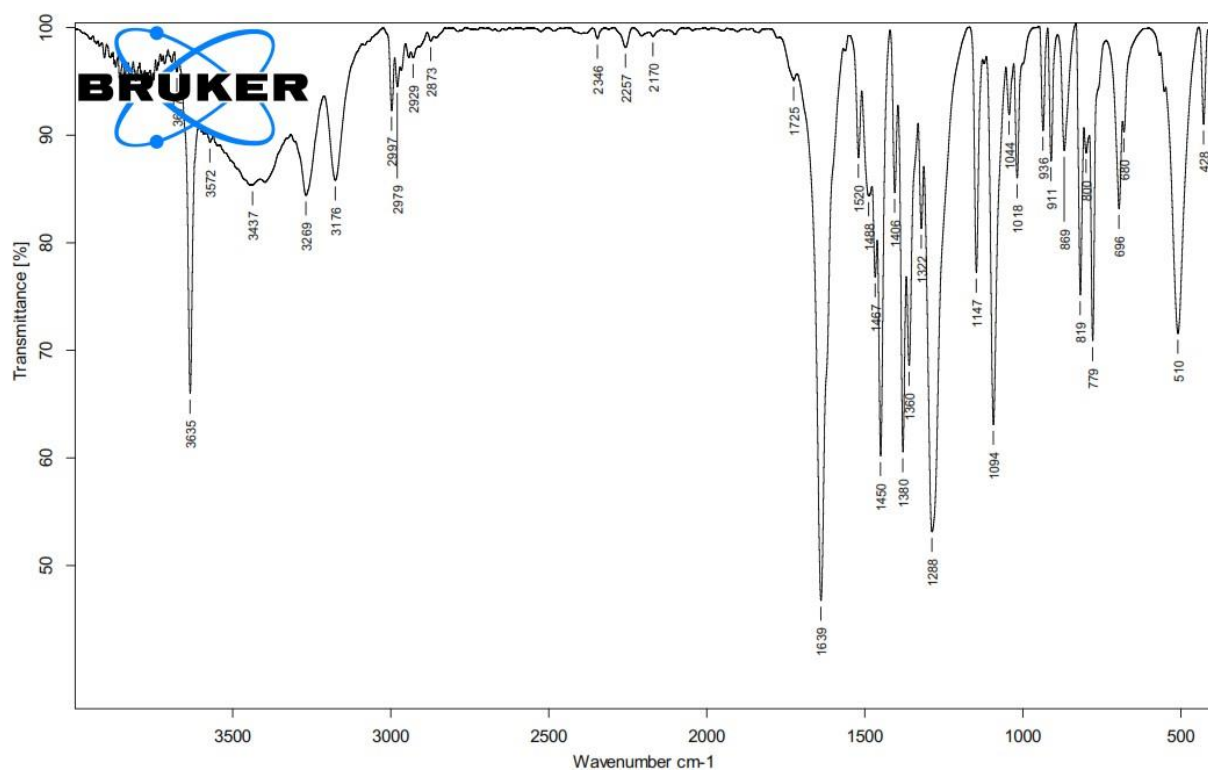

Supplement: s1 [file s1]
